# Supplementary material for: Standard wound management versus negative-pressure wound therapy in the treatment of adult patients having surgical incisions for major trauma to the lower limb—a two-arm parallel group superiority randomised controlled trial: protocol for Wound Healing in Surgery for Trauma (WHIST)
Source: PubMed Central journal article supplement — BMJ Open. 2018 Jun 7;8(6):e022115. doi: 10.1136/bmjopen-2018-022115 (PMC6009622; doi:10.1136/bmjopen-2018-022115), 2018-06-07
Supplement: bmjopen-2018-022115.draft_revisions.pdf [file bmjopen-2018-022115.draft_revisions.pdf]

# BMJ Open

BMJ Open is committed to open peer review. As part of this commitment we make the peer review history of every article we publish publicly available.

When an article is published we post the peer reviewers' comments and the authors' responses online. We also post the versions of the paper that were used during peer review. These are the versions that the peer review comments apply to.

The versions of the paper that follow are the versions that were submitted during the peer review process. They are not the versions of record or the final published versions. They should not be cited or distributed as the published version of this manuscript.

BMJ Open is an open access journal and the full, final, typeset and author-corrected version of record of the manuscript is available on our site with no access controls, subscription charges or pay-per-view fees (<http://bmjopen.bmj.com>).

If you have any questions on BMJ Open's open peer review process please email [info.bmjopen@bmj.com](mailto:info.bmjopen@bmj.com)

# BMJ Open

**Standard wound management versus negative pressure wound therapy in the treatment of adult patients having surgical incisions for major trauma to the lower limb, a two arm parallel group superiority randomised controlled trial: protocol for Wound Healing in Surgery for Trauma (WHIST)**

|                               |                                                                                                                                                                                                                                                                                                                                                                                                                                                                                                                                                                                                                                                                                                            |
|-------------------------------|------------------------------------------------------------------------------------------------------------------------------------------------------------------------------------------------------------------------------------------------------------------------------------------------------------------------------------------------------------------------------------------------------------------------------------------------------------------------------------------------------------------------------------------------------------------------------------------------------------------------------------------------------------------------------------------------------------|
| Journal:                      | <i>BMJ Open</i>                                                                                                                                                                                                                                                                                                                                                                                                                                                                                                                                                                                                                                                                                            |
| Manuscript ID                 | bmjopen-2018-022115                                                                                                                                                                                                                                                                                                                                                                                                                                                                                                                                                                                                                                                                                        |
| Article Type:                 | Protocol                                                                                                                                                                                                                                                                                                                                                                                                                                                                                                                                                                                                                                                                                                   |
| Date Submitted by the Author: | 02-Feb-2018                                                                                                                                                                                                                                                                                                                                                                                                                                                                                                                                                                                                                                                                                                |
| Complete List of Authors:     | Achten, Juul; University of Oxford, NDORMS<br>Vadher, Karan; University of Oxford, Center for Statistics in Medicine<br>Bruce, Julie; University of Warwick, Warwick Clinical Trials Unit<br>Nanchahal, Jagdeep; The University of Oxford, Kennedy Institute<br>Spoors, Louise; University of Oxford, Oxford Trauma, NDORMS<br>Masters, James; University of Oxford Nuffield Department of Orthopaedics<br>Rheumatology and Musculoskeletal Sciences, Oxford Trauma<br>Dutton, Susan; University of Oxford, CSM<br>Madan, Jason; University of Warwick, Warwick Medical School<br>Costa, Matthew; University of Oxford, Nuffield Department of<br>Orthopaedics, Rheumatology, and Musculoskeletal Sciences |
| Keywords:                     | ACCIDENT & EMERGENCY MEDICINE, WOUND MANAGEMENT, SURGERY,<br>Orthopaedic & trauma surgery < SURGERY                                                                                                                                                                                                                                                                                                                                                                                                                                                                                                                                                                                                        |
|                               |                                                                                                                                                                                                                                                                                                                                                                                                                                                                                                                                                                                                                                                                                                            |

SCHOLARONE™  
Manuscripts

1  
2  
3  
4 Standard wound management versus negative pressure wound therapy in the treatment of adult  
5 patients having surgical incisions for major trauma to the lower limb, a two arm parallel group  
6 superiority randomised controlled trial: protocol for Wound Healing in Surgery for Trauma (WHIST)  
7  
8  
9

10  
11  
12 Corresponding author

13 Professor Matthew Costa

14 Oxford Trauma, NDORMS

15 University of Oxford

16 Oxford, OX3 9DU

17 Matthew.costa@ndorms.ox.ac.uk

18  
19  
20  
21 01865 223114  
22  
23

24 Juul Achten<sup>1</sup>, Karan Vadher <sup>2</sup>, Julie Bruce <sup>3</sup>, Jagdeep Nanchahal<sup>4</sup>, Louise Spoons<sup>1</sup>, James Masters<sup>1</sup>,  
25 Susan Dutton<sup>2</sup>, Jason Madan<sup>3</sup> and Matthew Costa<sup>1</sup>  
26  
27  
28

29 <sup>1</sup> Oxford Trauma, Nuffield Department of Orthopaedics, Rheumatology & Musculoskeletal Sciences,  
30 University of Oxford, Oxford, UK  
31

32 <sup>2</sup> Oxford Clinical Trials Research Unit, Centre for Statistics in Medicine, Nuffield Department of  
33 Orthopaedics, Rheumatology & Musculoskeletal Sciences, University of Oxford, Oxford, UK  
34

35 <sup>3</sup> Warwick Clinical Trials Unit, Warwick Medical School, The University of Warwick, Coventry, UK  
36

37 <sup>4</sup> Kennedy Institute of Rheumatology, Nuffield Department of Orthopaedics, Rheumatology &  
38 Musculoskeletal Sciences, University of Oxford, Oxford, UK  
39  
40  
41  
42

43 Word count:  
44  
45  
46  
47  
48  
49  
50  
51  
52  
53  
54  
55  
56  
57  
58  
59  
60

## Abstract

### *Introduction*

Patients with closed high-energy injuries associated with major trauma, have surprisingly high rates of surgical site infection in incisions created during fracture fixation. One factor which may reduce the risk of surgical site infection is the type of dressing applied over the closed surgical incision. In this multi-centre randomised clinical trial, negative-pressure wound therapy will be compared with standard dressings with outcomes of deep infection, quality of life, pain and disability.

### *Methods and analysis*

Adult patients presenting to hospital within 72 hours of sustaining major trauma, requiring a surgical incision to treat a fractured lower limb are eligible for inclusion. Randomisation, stratified by trial centre, open/closed fracture at presentation, and Injury Severity Score  $\leq 15$  vs ISS  $\geq 16$  will be administered via a secure web-based service using minimisation. The random allocation will be to either standard wound management or negative pressure wound therapy.

Trial participants will usually have clinical follow-up at the local fracture clinic for a minimum of 6 months, as per standard NHS practice. Diagnosis of deep infection will be recorded at 30 days. Functional, pain and quality of life outcome data will be collected using the Disability Rating Index, Douleur Neuropathique Questionnaire and EQ-5D-5L questionnaires at 3 months and 6 months post-injury. Further data will be captured on resource use and any late post-operative complications. Longer term outcomes will be assessed annually for five years and reported separately.

### *Ethics and Dissemination*

National Research Ethic Committee approved this study on 16/02/2016 16/WM/0006

The NIHR Health Technology Assessment monograph and a manuscript to a peer-reviewed journal will be submitted upon completion of this trial. The results of this trial will inform clinical practice on the clinical and cost effectiveness of the treatment of this injury.

This study has been registered on the ISRCTN registry with reference number ISRCTN12702354

*Abstract word count: 299*

**Strength and limitations of this study**

- Broad eligibility criteria to ensure generalisability.
- Deep infection data will be supplemented with patient-reported outcomes.
- Assessment of outcomes at multiple time points will allow for information on recovery profile.
- In addition to a comparison of clinical outcomes, a full cost-effectiveness evaluation will be performed.
- It will not be possible to blind patients to their allocated treatment, as the type of wound dressing will be clearly visible.

## Background

Major trauma is the leading cause of death in people aged under 45 years and a significant cause of short- and long-term morbidity. The National Audit Office (NAO) estimates that there are at least 20,000 cases of Major Trauma each year in England, resulting in 5,400 deaths and many survivors suffer permanent disabilities requiring long-term care. The NAO estimate that trauma costs the NHS between £0.3 and £0.4 billion a year for immediate treatment. This does not include the cost of subsequent hospital treatments, rehabilitation, home care support, or informal carers. The NAO estimate that the annual lost economic output from traumatic injury is between £3.3 billion and £3.7 billion.

Fractures of the limbs are extremely common injuries, with 85% of major trauma patients sustaining serious limb injuries.<sup>1</sup> In open fractures of the lower limb, where the broken bone is exposed to the environment by a breach in the skin, the risk of infection is particularly high.<sup>1</sup> However, even in closed high-energy injuries associated with major trauma, the rate of infection remains high. For example, tibial plateau fractures are associated with average infection rates of up to 27%,<sup>2-6</sup> while pilon fractures have an incidence of deep infections ranging from 5% to 40%<sup>7-10</sup>. If surgical site infection does occur, treatment frequently continues for years after the initial injury. This often involves prolonged courses of antibiotics, with attendant risk of antibiotic resistance in chronic wounds, and a huge health care cost associated with such injuries. A US study found that the average cost associated with infection was \$163,000 if the limb could be salvaged and \$500,000+ where amputation was necessary, and these only represent a fraction of the subsequent personal and societal costs<sup>11</sup>.

Major trauma patients are at greater risk of infection due to several factors, including the presence of antibiotic resistant organisms in the ITU and high-dependency environment. Furthermore, the presence of a wound haematoma or postoperative wound leak oozing may predispose to infection in wounds created by surgical incisions. One of the factors which may reduce the risk of surgical site infection is the type of dressing applied over the closed incision at completion of the operative procedure. Dressings may reduce bacterial ingress into the wound. The published literature suggests that the type of dressing applied to the wound influences the healing process itself<sup>12</sup>. This trial concerns the type of dressing that is applied to the closed surgical incision at the end of the operation.

Traditionally, the surgical incision is covered with an adhesive dressing or gauze maintained in place with a bandage to protect the wound from contamination from the outside environment. These 'standard dressings' have been used throughout the NHS and in military practice for many years. Negative-pressure wound therapy (NPWT) or topical negative pressure is an alternative form of

1  
2  
3 dressing which may be applied to closed surgical incisions. In this treatment, an 'open-cell', solid  
4 foam overlies the incision and is covered with a semipermeable membrane which is only permeable  
5 to gas. A sealed tube is used to connect the foam to a pump, which creates a partial vacuum over the  
6 wound. This negative-pressure therapy provides a sealed environment, preventing bacterial ingress  
7 and removes blood and serous fluid exuding from the wound. The application of negative pressure  
8 to the foam leads to the application of positive pressure to the wound bed and has been shown to  
9 reduce the incidence of wound haematoma<sup>13</sup>. Recent laboratory studies suggest that NPWT shifts  
10 the cytokine profile to being less inflammatory, potentially promoting the production of pro-  
11 angiogenic growth factors and enzymes responsible for matrix remodelling, leading to improved  
12 wound healing.<sup>12</sup> However, NPWT for closed wounds is considerably more expensive than traditional  
13 wound dressings. There has been only one randomised trial comparing standard wound dressing  
14 with NPWT for patients with closed surgical wounds following major trauma to the lower limb.<sup>13</sup> This  
15 trial demonstrated a reduction in the rate of late/deep wound infection in the group of patients  
16 treated with NPWT (9%) versus the standard dressing group (15%). However, the reduction was of  
17 borderline statistical significance ( $p=0.049$ ) and the study has been criticised in the subsequent  
18 Cochrane review for methodological flaws.<sup>14</sup>

19  
20 The recent Cochrane review for surgical wounds concluded that *"it is still not clear whether NPWT*  
21 *promotes faster healing and reduces complications associated with clean surgery"*. *"Given the cost*  
22 *and widespread use of NPWT, there is an urgent need for suitably powered, high-quality trials to*  
23 *evaluate the effects of the newer NPWT products that are designed for use on clean, closed surgical*  
24 *incisions. Such trials should focus initially on wounds that may be difficult to heal"*.<sup>14</sup> The WHIST Trial  
25 aims to address this evidence gap.  
26  
27

### 28 **Good Clinical Practice**

29  
30 The trial will be carried out in accordance with Medical Research council (MRC) Good Clinical  
31 Practice and applicable UK legislation using the following protocol.  
32  
33

### 34 **CONSORT**

35  
36 The trial will be reported in line with the CONSORT statement using the non-pharmacological  
37 treatment interventions extension.  
38  
39  
40  
41  
42  
43  
44  
45  
46  
47  
48  
49  
50  
51  
52  
53  
54  
55  
56  
57  
58  
59  
60

## Trial design

### Aim

The aim of this pragmatic randomised controlled trial is to compare negative-pressure wound therapy with standard wound dressings for the treatment of surgical incisions associated with major trauma to the lower limb on outcomes of deep infection, quality of life, pain and disability.

The primary objective for the RCT is:

To quantify and draw inferences on differences in the rate of 'deep surgical site infection (SSI)' of the lower limb in the 30 days after randomisation between treatment arms of standard wound dressing versus NPWT. Any wound infection that requires continuing medical intervention or has already led to amputation at the 30-day review will be considered a 'deep' infection.

The secondary objectives are:

- i) To quantify and draw inferences on observed differences in the disability rating index (DRI) in the 6 months after the major trauma.
- ii) To quantify and draw inferences on observed differences in general health-related quality of life in the 6 months after the major trauma.
- iii) To quantify and draw inferences on the quality of wound healing, using a validated, patient-reported assessment of the scar. The patient-reported assessment will be supplemented with photographs taken at 6 weeks to objectively assess wound healing and apparent signs of infection.
- iv) To determine the number and nature of complications in the first 6 months after the major trauma: including chronic pain, deep SSI at 90 days and further surgical interventions related to the injury.
- v) To investigate the cost effectiveness, of negative pressure wound therapy versus standard dressing for wounds associated with major trauma to the lower limbs.

### Outcome measures

The primary outcome measure for this study is **Deep Surgical Site Infection**; We will use the Centers for Disease Control and Prevention (CDC) definition of a "deep surgical site infection", that is a wound infection involving the tissues deep to the skin that occurs within 30 days of injury.<sup>15</sup>

The treating clinical team will make the diagnosis of 'infection', as per routine clinical practice. The treating clinicians will not be part of the research team. As the prompt diagnosis and treatment of



1  
2 infection is fundamental to the patient's routine clinical care, the treating surgeon/clinician will  
3  
4 always document such a change in management in the patient's medical record. The medical records  
5  
6 will be reviewed by an independent research associate who will complete the Clinical Reporting  
7  
8 Forms, which will include the specific criteria used by the CDC to define a "deep surgical site  
9  
10 infection". Any infection that requires continuing medical intervention or has already led to  
11  
12 amputation at or after the 30-day review will be considered a deep infection.

13 The secondary outcome measures in this trial are:

14  
15 **Disability Rating Index** measured using a self-administered, 12-item Visual Analogue Scale  
16  
17 questionnaire assessing the patients' own rating of their disability.<sup>16</sup> This measure was chosen as it  
18  
19 addresses gross body movements rather than specific joints or body segments. Therefore, it will  
20  
21 capture function and disability associated with different fractures and injuries of the lower limbs.

22  
23 **EuroQol EQ-5D-5L:** The EuroQol EQ-5D is a validated measure of health-related quality of life,  
24  
25 consisting of a five dimension health status classification system and a separate visual analogue  
26  
27 scale.<sup>17</sup> An updated version of the EQ-5D with 5 response levels, the EQ-5D-5L, has recently been  
28  
29 developed to enhance the responsiveness of the instrument to changes in patient health.<sup>18</sup>  
30  
31 Responses to the health status classification system will be converted into multi-attribute utility  
32  
33 (MAU) scores using tariffs currently under development for England.<sup>19</sup> These MAU scores will be  
34  
35 combined with survival data to generate QALY profiles for the purposes of the economic evaluation.  
36  
37 The EQ-5D has been validated to be completed by a patient's proxy in case of continued impaired  
38  
39 capacity.

40  
41 **Wound Healing:** A patient-reported scar assessment will be collected using the patient scale from  
42  
43 the Patient and Observer Scar Assessment Scale<sup>22</sup> consisting of six questions regarding different  
44  
45 aspects of the scar, as well as an overall assessment of the scar. This will be used to provide a  
46  
47 subjective patient-assessment of wound healing. An objective assessment of wound healing using a  
48  
49 standardised photograph of the wound from the 30-day review will be evaluated by two  
50  
51 independent experienced assessors who are blind to the treatment allocation. Patients will also be  
52  
53 asked to self-report any treatment for infection will be cross-referenced with the participant's  
54  
55 medical record. This will allow us to report deep infection at later time-points, for example at 90  
56  
57 days.

58  
59 **Complications:** Chronic pain: The proportion of patients reporting chronic pain post-injury with  
60  
neuropathic characteristics will be measured using the Douleur Neuropathique Questionnaire

(DN420). Chronic pain after surgery and trauma is common and disabling but no previous studies have assessed the prevalence of persistent painful neuropathic characteristics after lower limb fracture. The interview versions of the DN4 is a short validated neuropathic pain screening tool comprising seven questions. This screening tool is recommended for use by the International Association for the Study of Pain (IASP 21). Scores of 3 or greater are likely to be indicative of neuropathic pain. Patients will also be asked to self-report (or a consultee on their behalf, in case of continued impaired capacity) at each of the follow-up points on wound healing complications, any treatment for infection and any medical/surgical intervention related to infection associated with their surgical wound. Any self-report of treatment for infection will be cross-referenced with the participant's medical record. This will allow us to report deep infection at later time-points, for example at 90 days. All other post-operative complications and surgical interventions related to the index wound will be recorded.

**Resource use** will be monitored for the economic analysis. Unit cost data will be obtained from national databases such as the BNF and PSSRU Costs of Health and Social Care.<sup>23</sup> Where these are not available the unit cost will be estimated in consultation with the hospital finance department. The cost consequences following discharge, including NHS costs and patients' out-of-pocket expenses will be recorded via a short questionnaire which will be administered at three and six months post major trauma. Patient self-reported (or consultee reported) information on service use has been shown to be accurate in terms of the intensity of use of different services.<sup>24</sup>

#### *Data collection*

Table 1 displays the time points when outcome measures are being collected.

| <b>TIME POINT</b> | <b>DATA COLLECTION</b>                                                                                                      |
|-------------------|-----------------------------------------------------------------------------------------------------------------------------|
| Baseline          | DRI and EQ-5D <i>pre-injury and contemporary</i> ,                                                                          |
| 30 days           | Deep infection, complication records, scar assessment, operative record, photograph of limb wound                           |
| 3 months          | DRI, EQ-5D, DN4, scar assessment, record of complications/rehabilitation or other interventions and economics questionnaire |
| 6 months          | DRI, EQ-5D, DN4, scar assessment, record of complications/rehabilitation or other interventions and economics questionnaire |
| 12 months         | DRI, EQ-5D, DN4, record of complications/ further interventions                                                             |
| 2,3,4,5 years     | DRI, EQ-5D, DN4, record of complications/ further interventions                                                             |

**Table 1: outcome collection**

1  
2 For the purposes of long-term follow-up, patients will subsequently be contacted on an annual basis  
3  
4 for 5 years to complete the EQ-5D-5L, DRI and DN4 questionnaires. Longer-term follow-up will be  
5 reported separately.  
6  
7

## 8 9 **Sample size**

10 There has only been one previous randomised trial to compare negative pressure wound therapy to  
11 standard dressings for surgical incisions associated with major trauma to the lower limb. This trial  
12 indicated that the rate of 'late' (deep) infection was 15% in the standard dressing group versus 9% in  
13 the NPWT group.<sup>13</sup>

14 In the absence of a 'Minimum Clinically Important Difference' for deep wound infection, we surveyed  
15 surgeons in the UK Orthopaedic Trauma Society who perform surgery for major trauma to the limbs  
16 (unpublished data 2015). The survey showed that those who responded to the survey considered  
17 that a 6% reduction in the rate of 'deep infection' would, universally, be sufficient to change clinical  
18 practice with regard to the choice of wound dressing.  
19

20 Therefore, assuming a reduction in the proportion of patients having a deep infection from 15% to  
21 9%, 615 patients would be required in each group to provide 90% power at the 5% level. Our  
22 previous experience in clinical trials of lower limb fracture surgery for major trauma indicates that up  
23 to 20% of primary outcome data may be lost during the follow-up period; due to death and loss to  
24 follow-up. Therefore, we aim to recruit **1540 patients** in total for this trial.  
25  
26  
27  
28  
29  
30  
31  
32

## 33 34 **Methodology**

### 35 36 *Screening*

37 Patients will be screened from the Emergency Department or Trauma Unit from participating trial  
38 centres. Throughout the study, screening logs will be kept at each site to determine the number of  
39 patients assessed for eligibility and any reasons for any exclusion. Patients who decline to participate  
40 or withdraw from the study will be given the opportunity to discuss/inform the research team of  
41 their reasoning behind their decision not to take part.  
42  
43

44 The patient's routine imaging on admission will be used, including any 'Major Trauma CT scan', and  
45 associated 'secondary survey' to identify the patient's injuries and calculate the Injury Severity Score  
46 (15 or less vs 16 or more) before randomisation. All major trauma patients in England are  
47 automatically considered for entry onto the national Trauma Audit and Research Network database,  
48 which requires the calculation of the Injury Severity Score. Therefore, all centres are familiar with the  
49 use of this major trauma scoring system.  
50  
51  
52  
53  
54  
55  
56  
57  
58  
59  
60

### *Eligibility*

Patients will be eligible for WHIST if:

They are aged 16 years or older

Present to hospital within 72 hours of injury

They have a major trauma injury and/or TARN eligible injury as defined by eligibility for the UK Trauma Audit Research Network (TARN) database

They have a lower limb fracture requiring a surgical incision.

Some patients have major trauma affecting just one limb, for example heel, pilon and tibial plateau fractures. Since the wounds associated with these injuries are always at risk, we will include these injuries even if the patient is subsequently not included in TARN.

Patients will be excluded from participation in WHIST if:

They have an open fracture of the lower limb which cannot be closed primarily.

There is evidence that the patient would be unable to adhere to trial procedures or complete questionnaires. It is expected that for a small proportion of patients, for example those with head injury, this exclusion criterion will only be determined after randomisation. These patients will then be excluded from the study.

Patients who sustain injuries to areas of the body other than the lower limbs, which may affect the primary outcome measure, will have their other injuries documented but will still be included in the analysis. For patients with more than one lower limb injury, only the most severe wound will be included as the 'WHIST' wound in the trial. It will be up to the surgeon's discretion to decide which injury is the most severe.

### *Consent to participating*

Many patients with major trauma will be operated on immediately or on the next available trauma operating list. Some patients may be unconscious, all will be distracted by their injury and its subsequent treatment and all will have had large doses of opiates for pain relief, potentially affecting their ability to process study-related information. Similarly, patients' next of kin, carers and friends are often anxious at this time and may have difficulty in considering the large amounts of information that they are given about the injury and plan for treatment. In this emergency situation, the focus is on obtaining consent for surgery (where possible) and informing the patient and any next of kin about immediate clinical care. The consent procedure for this trial will reflect that of the surgery, with the attending clinician assessing capacity before taking consent for the surgical

1  
2 procedure and this capacity assessment then being used to decide on the proper approach to  
3  
4 consenting to the WHIST study. An appropriate method, in line with the mental capacity act and as  
5  
6 approved by the National Research Ethics Service, will then be used to gain either prospective or  
7  
8 retrospective consent from the patient or appropriate consultee, by an appropriately delegated  
9  
10 member of the research team.

### 11 *Randomisation*

12  
13 The treating surgeon will confirm participant eligibility at the end of the operative procedure but  
14  
15 before the wound dressing is applied. Randomisation will be on a 1:1 basis, using a validated  
16  
17 computer randomisation program managed centrally by the Oxford Clinical Trials Research Unit  
18  
19 (OCTRU). A minimisation algorithm, will be used to ensure balanced allocation of patients across the  
20  
21 two treatment groups, stratified by trial centre, open or closed fracture at presentation and Injury  
22  
23 Severity Score (ISS)  $\leq 15$  vs  $\geq 16$ . The first 30 participants will be randomised using simple  
24  
25 randomisation to seed the minimisation algorithm (generated by the trial statistician), and the  
26  
27 minimisation algorithm will have probabilistic element of 0.8 introduced to ensure unpredictability of  
28  
29 the treatment assignment. After the randomisation is received electronically by the surgical team,  
30  
31 the allocated treatment can be administered immediately.

### 32 *Post randomisation withdrawals/exclusions*

33  
34 Participants will be excluded in the post-randomisation phase if it is later established that they are  
35  
36 unable to adhere to trial procedures or complete questionnaires.

37  
38 Participants may decline to continue to take part in the trial at any time without prejudice. A decision  
39  
40 to decline consent or withdraw will not affect the standard of care the patient receives.

### 41 *Blinding*

42  
43 As the wound dressings and topical devices are clearly visible, the treating surgeon and trial  
44  
45 participants cannot be blinded to treatment allocation. However, the treating surgeons will not be  
46  
47 involved in study follow-up assessments or data collection for the trial. Data from Clinical Reporting  
48  
49 forms will be entered onto a central database administered by a data clerk independent of the  
50  
51 clinical team in the trial central office. Wound photographs taken at outpatient clinic at  
52  
53 approximately 30 days post-surgery will be reviewed independently by two experienced assessors  
54  
55 blinded to the treatment allocation.  
56  
57  
58  
59  
60

## Trial treatments

Patients with a fracture of the lower limb associated with major trauma usually have surgery on the next available trauma operating list. Some patients may be transferred to a Major Trauma Centre for definitive care – within the first 48 hours of injury – but will still have their initial surgery as soon as possible. All patients will receive general or regional anaesthesia. At the end of the initial operation, a dressing is applied to the surgical wound. WHIST will compare two types of wound dressing; standard dressing versus negative pressure wound therapy.

*Standard dressing.* The standard dressing for a surgical wound comprises a non-adhesive layer applied directly to the wound which is then covered by a sealed dressing or bandage. The standard dressing does not use ‘negative pressure’. The exact details of the materials used will be left to the discretion of the treating surgeon as per their routine practice but the details of each dressing applied will be recorded.

*Negative-pressure wound therapy.* The NPWT dressing uses an ‘open-cell’, solid foam which is laid onto the wound as an intrinsic part of a sealed dressing. A sealed tube connects the dressing to a built in mini-pump which creates a partial vacuum over the wound.

The NPWT dressing will be applied to the wound at the end of the operation according to the treating surgeon’s normal practice and the dressing manufacturer’s instructions. The wound may be re-dressed again on the ward; any further wound dressing will be recorded and will follow the allocated treatment unless otherwise clinically indicated.

## Post-operative Rehabilitation

Patients will usually be reviewed at 3 and 6 months, as per routine practice after this type of injury. Details about rehabilitation and additional follow-up appointments will be recorded but left entirely to the discretion of the treating clinicians, as the type of injury will vary between patients.

## Adverse event management

Serious adverse events (SAE) will be entered onto the Serious Adverse Event reporting form and reported to the central study team. However, some adverse events are foreseeable as part of the proposed treatment, and will not be reported on an SAE reporting form, but recorded on a complications form. These events include: any complications of anaesthesia or surgery (wound infection, bleeding or damage to adjacent structures such as nerves, tendons and blood vessels, delayed unions/non-unions, delayed wound healing, further surgery to remove/replace metalwork and thromboembolic events). All participants experiencing SAEs will be followed-up as per protocol until the end of the trial.

## End of trial

The end of the main phase of the trial will be defined as the collection of final six month outcome data from the last participant. Longer-term follow-up will be reported separately.

## Analysis

### *Statistical analysis*

Baseline characteristics and outcome measures will be reported overall and separately for the two treatment arms using standard statistical summaries (e.g. medians and ranges or means and variances, or proportions and percentages, dependent on the distribution of the outcomes) including graphical presentation where appropriate.

The primary analysis will investigate differences in the primary outcome measure, the proportion of patients with deep SSI, at 30 days post operation. Although we have no reason to expect that clustering effects will be important for this study, in reality the data will be hierarchical in nature, with patients naturally clustered into groups by recruiting centre. Therefore, we will account for this by generalizing the conventional logistic (fixed-effects) regression approach to a mixed-effects logistic regression analysis. This model will be used to assess differences in the rate of deep SSI between the study intervention groups, with results presented as odds ratios with associated 95% confidence intervals. The mixed-effects model will include a random effect to account for any heterogeneity in response due to the recruitment centre and fixed effects to adjust for open versus closed fractures and the ISS, participant age and gender.

An identically structured and formulated mixed-effects linear or logistic regression model (as appropriate) will be used to assess the effects of the interventions on secondary outcomes DRI and EQ-5D-5L (at both 3 and 6 months, and for the long-term follow-up). Supplementary analyses for these outcomes will include using area under the curve summary statistics calculated from the mixed model parameter estimates to provide an overall estimate of recovery over time.<sup>25</sup> Other dichotomous outcome variables, such as complications related to the trial interventions will be analysed in the same manner as the primary outcome. Temporal patterns of any complications will be presented graphically and if appropriate a time-to-event analysis (Kaplan-Meier survival analysis) will be used to assess the overall risk and risk within individual classes of complications.

It seems likely that some data may not be available due to voluntary withdrawal of patients, lack of completion of individual data items or general loss to follow-up. Missing data will be minimised and the reasons for missing data will be ascertained and reported separately by treatment group. The

1  
2 amount, nature and pattern of missing data will be carefully considered and missing data will be  
3 imputed, using multiple imputation if appropriate.

4  
5 The primary population for analysis will be on an intention-to-treat (ITT) basis, i.e. analysed as they  
6 were randomised. In addition to the ITT analyses, sensitivity analyses including on the per-protocol  
7 population and to assess the missing data assumption if missing data imputation is used, will also be  
8 undertaken and reported in parallel to, but subsidiary to, the main analyses.

9  
10 About 1-2% of patients are expected to die during follow-up, so this is unlikely to be a serious cause  
11 of bias. If appropriate, we will conduct a supplementary analysis taking account of the competing  
12 risk of death, using methods described by Varadhan et al.<sup>26</sup>

13  
14 All reported tests will be two-sided and considered to provide evidence for a significant difference if  
15 p-values are less than 0.05 (5% significance level).

16  
17 A detailed statistical analysis plan (SAP) will be agreed with the Data Safety and Monitoring  
18 Committee (DSMC) at the commencement of or early in the study. This will be updated prior to the  
19 final data-lock following a blinded analysis of the data. Any subsequent changes to the analysis  
20 outlined in the SAP will be clearly stated and justified in the final report. Interim analyses of efficacy  
21 outcomes are not planned and will be performed only where requested by the independent DSMC.

22  
23 Analyses will be undertaken using validated statistical software such as Stata (Stata Corp LP -  
24 <http://www.stata.com>) or the software package R (<http://www.r-project.org/>).

### 25 26 27 **Economic evaluation**

28  
29 An economic evaluation will be integrated into the trial design. The economic evaluation will be  
30 conducted from the recommended NHS and personal social services (PSS) perspective<sup>23</sup>. Data  
31 will be collected on the health and social service resources used in the treatment of each trial  
32 participant during the period between randomisation and 6 months post-randomisation. Trial  
33 data collection forms will record the duration of each form of hospital care, surgical procedures,  
34 adjunctive interventions, medication profiles, tests and procedures. If required, information on  
35 additional staff and material inputs associated with clinical complications will be obtained  
36 directly from patient and clinical records. At 3 and 6 months post-randomisation, trial  
37 participants will be asked to complete postal questionnaires profiling hospital (inpatient and  
38 outpatient) and community health and social care resource use and, for the purposes of  
39 sensitivity analysis, out-of-pocket expenditures and costs associated with lost productivity.  
40 Current UK unit costs will be applied to each resource item to value total resource use in each  
41 arm of the trial. *Per diem* costs for hospital care, delineated by level or intensity of care, will be  
42 calculated by the health economics researcher using data from detailed questionnaires  
43 completed by the local finance departments, giving cost data and apportioning these to different  
44  
45  
46  
47  
48  
49  
50  
51  
52  
53  
54  
55  
56  
57  
58  
59  
60



1  
2 categories of patient using a 'top-down' methodology. The unit costs of clinical events that are  
3 unique to this trial will be derived from the hospital accounts of the trial participating centres,  
4 although primary research that uses established accounting methods may also be required. The  
5 unit costs of community health and social services will largely be derived from national sources,  
6 although some calculations from first principles using established accounting methods may also  
7 be required.<sup>27</sup> Responses to the EQ-5D-5L will be converted into multi-attribute utility scores  
8 using the algorithm currently under development to reflect societal preferences in England.<sup>19 28</sup>

9  
10  
11  
12  
13  
14  
15  
16  
17  
18  
19  
20  
21  
22  
23  
24  
25  
26  
27  
28  
29  
30  
31  
32  
33  
34  
35  
36  
37  
38  
39  
40  
41  
42  
43  
44  
45  
46  
47  
48  
49  
50  
51  
52  
53  
54  
55  
56  
57  
58  
59  
60

29 Crosswalking algorithms will be employed to generate supplementary utility values comparable with those derived from the EQ-5D-3L instrument.<sup>18</sup>

An incremental cost-effectiveness analysis, expressed in terms of incremental cost per quality-adjusted life year (QALY) gained, will be performed. Results will be presented using incremental cost-effectiveness ratios (ICERs) and cost-effectiveness acceptability curves (CEACs) generated via non-parametric bootstrapping. This accommodates sampling (or stochastic) uncertainty and varying levels of willingness to pay for an additional QALY. Issues with missing values, if they arise, will be accommodated using multiple imputation methods in line with the approach used in the clinical component of the trial.

### **Trial Oversight**

The day-to-day management of the trial will be the responsibility of the Clinical Trial Manager, based at Nuffield Department of Orthopaedics, Rheumatology and Musculoskeletal Sciences and supported by the OCTRU staff. This will be overseen by the Trial Management Group, who will meet monthly to assess progress. It will also be the responsibility of the Clinical Trial Manager to undertake training of the research associates at each of the trial centres. The Trial Statistician and Health Economist will be closely involved in setting up data capture systems, design of databases and clinical reporting forms.

A Trial Steering Committee (TSC) and a Data & Safety Monitoring Committee (DSMC) will be set up. The study DSMC will adopt a DAMOCLES charter which defines its terms of reference and operation in relation to oversight of the trial. They will not be asked to review any formal interim comparative analyses of effectiveness. They will, however, see copies of data accrued to date, or summaries of that data by treatment group and they will assess the screening algorithm against the eligibility criteria. They will also consider emerging evidence from other related trials or research and review related SAEs that have been reported. They may advise the chair of the Trial Steering Committee at any time if, in their view, the trial should be stopped for ethical reasons, including concerns about participant safety. DSMC meetings will be held at least annually during the recruitment phase of the study.

### Quality control

The study may be monitored, or audited in accordance with the current approved protocol, relevant regulations and standard operating procedures by the Host organization, Sponsor or appropriate Regulatory Authorities. A Monitoring Plan will be developed according to OCTRU standard operating procedures which involves a risk assessment. The monitoring activities are based on the outcome of the risk assessment and may involve central monitoring and site monitoring.

### Ethics and Dissemination

National Research Ethic Committee approved this study on the 16<sup>th</sup> of February 2016 (16/WM/0006). The study monograph for the National Institute for Health Research Health Technology Assessment will be prepared by the trial management team within three months of completion of the trial. A manuscript for a high impact peer-reviewed journal will be prepared simultaneously, which will allow for the results to be disseminated across the orthopaedic and rehabilitation communities, the wider medical community, NICE and policy makers. Authorship will be determined in accordance with the ICMJE guidelines and other contributors will be acknowledged. The results of this trial will substantially inform clinical practice on the clinical and cost effectiveness of the treatment of this injury. The results of this project will be disseminated to patients via patient-specific newsletters and through local mechanisms at all participating centres and a lay summary of the results will be available on the study website.

**Author contributions**

MC/JB/JPM/JN wrote the background section and developed the research question. MC/JA/LS were responsible for the research methodology and management sections of the protocol. KV/SD wrote the sample size and statistical analysis sections of the protocol. JM wrote the health economic evaluation section of the protocol.

All authors reviewed and agreed the final manuscript.

**Competing interest**

MC is a member of the UK NIHR HTA General Board.

**Funding**

This project was funded by the UK National Institute for Health Research Health Technology Assessment (HTA) Programme (project number 14/199/14) and was supported by the National Institute for Health Research (NIHR) Oxford Biomedical Research Centre. The funder has not been involved in the design of the study. The views expressed are those of the authors and not necessarily those of the NHS, the NIHR or the Department of Health.

## 8. References

1. TARN. [www.tarn.co.uk](http://www.tarn.co.uk) 2015
2. Young MJ, Barrack RL. Complications of internal fixation of tibial plateau fractures. *Orthop Rev* 1994;23(2):149-54.
3. Stokel EA, Sadasivan KK. Tibial plateau fractures: standardized evaluation of operative results. *Orthopedics* 1991;14(3):263-70.
4. Stannard JP, martin SL. Tibial plateau fractures. In: Stannard JP S, AH KP, eds. *Surgical Treatment of Orthopaedic Trauma*. New York: Thieme 2007:715–41.
5. Mallik AR, Covall DJ, Whitelaw GP. Internal versus external fixation of bicondylar tibial plateau fractures. *Orthop Rev* 1992;21(12):1433-6.
6. Koval KJ, Helfet DL. Tibial Plateau Fractures: Evaluation and Treatment. *J Am Acad Orthop Surg* 1995;3(2):86-94.
7. Wyrsh B, McFerran MA, McAndrew M, et al. Operative treatment of fractures of the tibial plafond. A randomized, prospective study. *The Journal of bone and joint surgery American volume* 1996;78(11):1646-57.
8. Teeny SM, Wiss DA. Open reduction and internal fixation of tibial plafond fractures. Variables contributing to poor results and complications. *Clinical orthopaedics and related research* 1993(292):108-17.
9. McFerran MA, Smith SW, Boulas HJ, et al. Complications encountered in the treatment of pilon fractures. *J Orthop Trauma* 1992;6(2):195-200.
10. Blauth M, Bastian L, Krettek C, et al. Surgical options for the treatment of severe tibial pilon fractures: a study of three techniques. *J Orthop Trauma* 2001;15(3):153-60.
11. MacKenzie EJ, Jones AS, Bosse MJ, et al. Health-care costs associated with amputation or reconstruction of a limb-threatening injury. *The Journal of bone and joint surgery American volume* 2007;89(8):1685-92.
12. Glass GE, Murphy GF, Esmaeili A, et al. Systematic review of molecular mechanisms of action of negative-pressure wound therapy. *Br J Surg*. 2014; 101 (13): 1627-36
13. Stannard JP, Volgas DA, McGwin G, 3rd, et al. Incisional negative pressure wound therapy after high-risk lower extremity fractures. *J Orthop Trauma* 2012;26(1):37-42.
14. Webster J, Scuffham P, Stankiewicz M, et al. Negative pressure wound therapy for skin grafts and surgical wounds healing by primary intention. *The Cochrane database of systematic reviews* 2014;10:CD009261.
15. Horan TC, Andrus M, Dudeck MA. CDC/NHSN surveillance definition of health care-associated infection and criteria for specific types of infections in the acute care setting. *Am J Infect Control* 2008;36(5):309-32.

- 1  
2 10.1016/j.ajic.2008.03.002 [published Online First: 2008/06/10]  
3  
4 16. Salen BA, Spangfort EV, Nygren AL, et al. The Disability Rating Index: an instrument for the  
5 assessment of disability in clinical settings. *J Clin Epidemiol* 1994;47(12):1423-35.  
6  
7 17. Brooks R. EuroQol: the current state of play. *Health Policy* 1996;37(1):53-72.  
8  
9 18. Herdman M, Gudex C, Lloyd A, et al. Development and preliminary testing of the new five-level  
10 version of EQ-5D (EQ-5D-5L). *Quality of life research : an international journal of quality of life*  
11 *aspects of treatment, care and rehabilitation* 2011;20(10):1727-36.  
12  
13 19. Oppe M, Devlin NJ, van Hout B, et al. A program of methodological research to arrive at the new  
14 international EQ-5D-5L valuation protocol. *Value in health : the journal of the International*  
15 *Society for Pharmacoeconomics and Outcomes Research* 2014;17(4):445-53.  
16  
17 20. Bouhassira D, Lanteri-Minet M, Attal N, et al. Prevalence of chronic pain with neuropathic  
18 characteristics in the general population. *Pain* 2008;136(3):380-7.  
19  
20 21. Haanpaa M, Attal N, Backonja M, et al. NeuPSIG guidelines on neuropathic pain assessment. *Pain*  
21 2011;152(1):14-27.  
22  
23 22. Draaijers, L.J., et al., *The patient and observer scar assessment scale: a reliable and feasible tool*  
24 *for scar evaluation*. *Plastic and reconstructive Surgery*, 2004. 113(7): p. 1960-1965.  
25  
26 23. From: CLA. Unit Costs of Health and Social Care 2014. 2014 [  
27  
28 24. Self-reports of health care utilisation: can a questionnaire replace a diary? 16th Annual meeting  
29 of the international society for health technology assessment in health care; 2000; The Hague,  
30 The Netherlands.  
31  
32 25. Bell M.L., King, M. T., & Fairclough, D. L. (2014). Bias in area under the curve for longitudinal  
33 clinical trials with missing patient reported outcome data: summary measures versus summary  
34 statistics. *SAGE Open*, 4(2), 2158244014534858  
35  
36 26. Varadhan R, Weiss CO, Segal JB, et al. Evaluating health outcomes in the presence of competing  
37 risks: a review of statistical methods and clinical applications. *Medical care* 2010;48(6 Suppl):S96-  
38 105.  
39  
40 27. Allen C, Beecham J. Costing services: ideals & reality. In: Beecham ANaJ, ed. *Costing Community*  
41 *Care: Theory & Practice* Ashgate Publishing Ltd 1993:25-42.  
42  
43 28. Brazier J, Roberts J, Deverill M. The estimation of a preference-based measure of health from the  
44 SF-36. *J Health Econ* 2002;21(2):271-92.  
45  
46 29. Dolan P. Modeling valuations for EuroQol health states. *Med Care* 1997;35(11):1095-108.  
47  
48  
49  
50  
51  
52  
53  
54  
55  
56  
57  
58  
59  
60

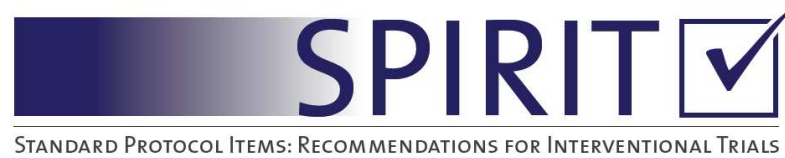

SPIRIT 2013 Checklist: Recommended items to address in a clinical trial protocol and related documents\*

| Section/item                      | Item No | Description                                                                                                                                                                                                                                                                              | Addressed on page number |
|-----------------------------------|---------|------------------------------------------------------------------------------------------------------------------------------------------------------------------------------------------------------------------------------------------------------------------------------------------|--------------------------|
| <b>Administrative information</b> |         |                                                                                                                                                                                                                                                                                          |                          |
| Title                             | 1       | Descriptive title identifying the study design, population, interventions, and, if applicable, trial acronym                                                                                                                                                                             | ___1___                  |
| Trial registration                | 2a      | Trial identifier and registry name. If not yet registered, name of intended registry                                                                                                                                                                                                     | ___2___                  |
|                                   | 2b      | All items from the World Health Organization Trial Registration Data Set                                                                                                                                                                                                                 | ___n/a___                |
| Protocol version                  | 3       | Date and version identifier                                                                                                                                                                                                                                                              | ___n/a___                |
| Funding                           | 4       | Sources and types of financial, material, and other support                                                                                                                                                                                                                              | ___2+17___               |
| Roles and responsibilities        | 5a      | Names, affiliations, and roles of protocol contributors                                                                                                                                                                                                                                  | ___1+17___               |
|                                   | 5b      | Name and contact information for the trial sponsor                                                                                                                                                                                                                                       | ___n/a___                |
|                                   | 5c      | Role of study sponsor and funders, if any, in study design; collection, management, analysis, and interpretation of data; writing of the report; and the decision to submit the report for publication, including whether they will have ultimate authority over any of these activities | ___17___                 |
|                                   | 5d      | Composition, roles, and responsibilities of the coordinating centre, steering committee, endpoint adjudication committee, data management team, and other individuals or groups overseeing the trial, if applicable (see Item 21a for data monitoring committee)                         | ___n/a___                |

1  
2  
3  
4  
5  
6  
7  
8  
9  
10  
11  
12  
13  
14  
15  
16  
17  
18  
19  
20  
21  
22  
23  
24  
25  
26  
27  
28  
29  
30  
31  
32  
33  
34  
35  
36  
37  
38  
39  
40  
41  
42  
43  
44  
45  
46  
47

### Introduction

|                          |    |                                                                                                                                                                                                           |             |
|--------------------------|----|-----------------------------------------------------------------------------------------------------------------------------------------------------------------------------------------------------------|-------------|
| Background and rationale | 6a | Description of research question and justification for undertaking the trial, including summary of relevant studies (published and unpublished) examining benefits and harms for each intervention        | ___ 4-5 ___ |
|                          | 6b | Explanation for choice of comparators                                                                                                                                                                     | ___ 4-5 ___ |
| Objectives               | 7  | Specific objectives or hypotheses                                                                                                                                                                         | ___ 6 ___   |
| Trial design             | 8  | Description of trial design including type of trial (eg, parallel group, crossover, factorial, single group), allocation ratio, and framework (eg, superiority, equivalence, noninferiority, exploratory) | ___ 1 ___   |

### Methods: Participants, interventions, and outcomes

|                      |     |                                                                                                                                                                                                                                                                                                                                                                                |               |
|----------------------|-----|--------------------------------------------------------------------------------------------------------------------------------------------------------------------------------------------------------------------------------------------------------------------------------------------------------------------------------------------------------------------------------|---------------|
| Study setting        | 9   | Description of study settings (eg, community clinic, academic hospital) and list of countries where data will be collected. Reference to where list of study sites can be obtained                                                                                                                                                                                             | ___ 9 ___     |
| Eligibility criteria | 10  | Inclusion and exclusion criteria for participants. If applicable, eligibility criteria for study centres and individuals who will perform the interventions (eg, surgeons, psychotherapists)                                                                                                                                                                                   | ___ 9-10 ___  |
| Interventions        | 11a | Interventions for each group with sufficient detail to allow replication, including how and when they will be administered                                                                                                                                                                                                                                                     | ___ 11-12 ___ |
|                      | 11b | Criteria for discontinuing or modifying allocated interventions for a given trial participant (eg, drug dose change in response to harms, participant request, or improving/worsening disease)                                                                                                                                                                                 | ___ n/a ___   |
|                      | 11c | Strategies to improve adherence to intervention protocols, and any procedures for monitoring adherence (eg, drug tablet return, laboratory tests)                                                                                                                                                                                                                              | ___           |
|                      | 11d | Relevant concomitant care and interventions that are permitted or prohibited during the trial                                                                                                                                                                                                                                                                                  | ___           |
| Outcomes             | 12  | Primary, secondary, and other outcomes, including the specific measurement variable (eg, systolic blood pressure), analysis metric (eg, change from baseline, final value, time to event), method of aggregation (eg, median, proportion), and time point for each outcome. Explanation of the clinical relevance of chosen efficacy and harm outcomes is strongly recommended | ___ 6-8 ___   |

|    |                      |    |                                                                                                                                                                                       |           |
|----|----------------------|----|---------------------------------------------------------------------------------------------------------------------------------------------------------------------------------------|-----------|
| 1  |                      |    |                                                                                                                                                                                       |           |
| 2  |                      |    |                                                                                                                                                                                       |           |
| 3  | Participant timeline | 13 | Time schedule of enrolment, interventions (including any run-ins and washouts), assessments, and visits for participants. A schematic diagram is highly recommended (see Figure)      | ___ 8 ___ |
| 4  |                      |    |                                                                                                                                                                                       |           |
| 5  | Sample size          | 14 | Estimated number of participants needed to achieve study objectives and how it was determined, including clinical and statistical assumptions supporting any sample size calculations | ___ 9 ___ |
| 6  |                      |    |                                                                                                                                                                                       |           |
| 7  |                      |    |                                                                                                                                                                                       |           |
| 8  | Recruitment          | 15 | Strategies for achieving adequate participant enrolment to reach target sample size                                                                                                   | _____     |
| 9  |                      |    |                                                                                                                                                                                       |           |
| 10 |                      |    |                                                                                                                                                                                       |           |

### 11 **Methods: Assignment of interventions (for controlled trials)**

#### 12 Allocation:

|    |                                  |     |                                                                                                                                                                                                                                                                                                                                                          |             |
|----|----------------------------------|-----|----------------------------------------------------------------------------------------------------------------------------------------------------------------------------------------------------------------------------------------------------------------------------------------------------------------------------------------------------------|-------------|
| 13 |                                  |     |                                                                                                                                                                                                                                                                                                                                                          |             |
| 14 |                                  |     |                                                                                                                                                                                                                                                                                                                                                          |             |
| 15 | Sequence generation              | 16a | Method of generating the allocation sequence (eg, computer-generated random numbers), and list of any factors for stratification. To reduce predictability of a random sequence, details of any planned restriction (eg, blocking) should be provided in a separate document that is unavailable to those who enrol participants or assign interventions | ___ 11 ___  |
| 16 |                                  |     |                                                                                                                                                                                                                                                                                                                                                          |             |
| 17 |                                  |     |                                                                                                                                                                                                                                                                                                                                                          |             |
| 18 |                                  |     |                                                                                                                                                                                                                                                                                                                                                          |             |
| 19 |                                  |     |                                                                                                                                                                                                                                                                                                                                                          |             |
| 20 | Allocation concealment mechanism | 16b | Mechanism of implementing the allocation sequence (eg, central telephone; sequentially numbered, opaque, sealed envelopes), describing any steps to conceal the sequence until interventions are assigned                                                                                                                                                | ___ 11 ___  |
| 21 |                                  |     |                                                                                                                                                                                                                                                                                                                                                          |             |
| 22 |                                  |     |                                                                                                                                                                                                                                                                                                                                                          |             |
| 23 |                                  |     |                                                                                                                                                                                                                                                                                                                                                          |             |
| 24 | Implementation                   | 16c | Who will generate the allocation sequence, who will enrol participants, and who will assign participants to interventions                                                                                                                                                                                                                                | ___ 11 ___  |
| 25 |                                  |     |                                                                                                                                                                                                                                                                                                                                                          |             |
| 26 |                                  |     |                                                                                                                                                                                                                                                                                                                                                          |             |
| 27 | Blinding (masking)               | 17a | Who will be blinded after assignment to interventions (eg, trial participants, care providers, outcome assessors, data analysts), and how                                                                                                                                                                                                                | ___ 11 ___  |
| 28 |                                  |     |                                                                                                                                                                                                                                                                                                                                                          |             |
| 29 |                                  |     |                                                                                                                                                                                                                                                                                                                                                          |             |
| 30 |                                  | 17b | If blinded, circumstances under which unblinding is permissible, and procedure for revealing a participant's allocated intervention during the trial                                                                                                                                                                                                     | ___ n/a ___ |
| 31 |                                  |     |                                                                                                                                                                                                                                                                                                                                                          |             |
| 32 |                                  |     |                                                                                                                                                                                                                                                                                                                                                          |             |
| 33 |                                  |     |                                                                                                                                                                                                                                                                                                                                                          |             |

### 34 **Methods: Data collection, management, and analysis**

|    |                         |     |                                                                                                                                                                                                                                                                                                                                                                                                              |             |
|----|-------------------------|-----|--------------------------------------------------------------------------------------------------------------------------------------------------------------------------------------------------------------------------------------------------------------------------------------------------------------------------------------------------------------------------------------------------------------|-------------|
| 35 |                         |     |                                                                                                                                                                                                                                                                                                                                                                                                              |             |
| 36 | Data collection methods | 18a | Plans for assessment and collection of outcome, baseline, and other trial data, including any related processes to promote data quality (eg, duplicate measurements, training of assessors) and a description of study instruments (eg, questionnaires, laboratory tests) along with their reliability and validity, if known. Reference to where data collection forms can be found, if not in the protocol | ___ 6-8 ___ |
| 37 |                         |     |                                                                                                                                                                                                                                                                                                                                                                                                              |             |
| 38 |                         |     |                                                                                                                                                                                                                                                                                                                                                                                                              |             |
| 39 |                         |     |                                                                                                                                                                                                                                                                                                                                                                                                              |             |
| 40 |                         |     |                                                                                                                                                                                                                                                                                                                                                                                                              |             |
| 41 |                         |     |                                                                                                                                                                                                                                                                                                                                                                                                              |             |
| 42 |                         |     |                                                                                                                                                                                                                                                                                                                                                                                                              |             |
| 43 |                         |     |                                                                                                                                                                                                                                                                                                                                                                                                              |             |
| 44 |                         |     |                                                                                                                                                                                                                                                                                                                                                                                                              |             |
| 45 |                         |     |                                                                                                                                                                                                                                                                                                                                                                                                              |             |
| 46 |                         |     |                                                                                                                                                                                                                                                                                                                                                                                                              |             |
| 47 |                         |     |                                                                                                                                                                                                                                                                                                                                                                                                              |             |



1  
2  
3  
4  
5  
6  
7  
8  
9  
10  
11  
12  
13  
14  
15  
16  
17

|                     |     |                                                                                                                                                                                                                                                                   |               |
|---------------------|-----|-------------------------------------------------------------------------------------------------------------------------------------------------------------------------------------------------------------------------------------------------------------------|---------------|
|                     | 18b | Plans to promote participant retention and complete follow-up, including list of any outcome data to be collected for participants who discontinue or deviate from intervention protocols                                                                         | ___ n/a ___   |
| Data management     | 19  | Plans for data entry, coding, security, and storage, including any related processes to promote data quality (eg, double data entry; range checks for data values). Reference to where details of data management procedures can be found, if not in the protocol | _____         |
| Statistical methods | 20a | Statistical methods for analysing primary and secondary outcomes. Reference to where other details of the statistical analysis plan can be found, if not in the protocol                                                                                          | ___ 13-15 ___ |
|                     | 20b | Methods for any additional analyses (eg, subgroup and adjusted analyses)                                                                                                                                                                                          | ___ 13-15 ___ |
|                     | 20c | Definition of analysis population relating to protocol non-adherence (eg, as randomised analysis), and any statistical methods to handle missing data (eg, multiple imputation)                                                                                   | ___ 13-15 ___ |

**Methods: Monitoring**

18  
19  
20  
21  
22  
23  
24  
25  
26  
27  
28  
29  
30  
31  
32  
33  
34

|                 |     |                                                                                                                                                                                                                                                                                                                                       |             |
|-----------------|-----|---------------------------------------------------------------------------------------------------------------------------------------------------------------------------------------------------------------------------------------------------------------------------------------------------------------------------------------|-------------|
| Data monitoring | 21a | Composition of data monitoring committee (DMC); summary of its role and reporting structure; statement of whether it is independent from the sponsor and competing interests; and reference to where further details about its charter can be found, if not in the protocol. Alternatively, an explanation of why a DMC is not needed | ___ 15 ___  |
|                 | 21b | Description of any interim analyses and stopping guidelines, including who will have access to these interim results and make the final decision to terminate the trial                                                                                                                                                               | ___ n/a ___ |
| Harms           | 22  | Plans for collecting, assessing, reporting, and managing solicited and spontaneously reported adverse events and other unintended effects of trial interventions or trial conduct                                                                                                                                                     | ___ 12 ___  |
| Auditing        | 23  | Frequency and procedures for auditing trial conduct, if any, and whether the process will be independent from investigators and the sponsor                                                                                                                                                                                           | ___ 15 ___  |

**Ethics and dissemination**

35  
36  
37  
38  
39  
40  
41  
42  
43  
44  
45  
46  
47

|                          |    |                                                                                           |            |
|--------------------------|----|-------------------------------------------------------------------------------------------|------------|
| Research ethics approval | 24 | Plans for seeking research ethics committee/institutional review board (REC/IRB) approval | ___ 16 ___ |
|--------------------------|----|-------------------------------------------------------------------------------------------|------------|

|    |                      |     |                                                                                                                 |             |
|----|----------------------|-----|-----------------------------------------------------------------------------------------------------------------|-------------|
| 1  |                      |     |                                                                                                                 |             |
| 2  |                      |     |                                                                                                                 |             |
| 3  | Protocol             | 25  | Plans for communicating important protocol modifications (eg, changes to eligibility criteria, outcomes,        | _____       |
| 4  | amendments           |     | analyses) to relevant parties (eg, investigators, REC/IRBs, trial participants, trial registries, journals,     |             |
| 5  |                      |     | regulators)                                                                                                     |             |
| 6  |                      |     |                                                                                                                 |             |
| 7  | Consent or assent    | 26a | Who will obtain informed consent or assent from potential trial participants or authorised surrogates, and      | ___ 10 ___  |
| 8  |                      |     | how (see Item 32)                                                                                               |             |
| 9  |                      |     |                                                                                                                 |             |
| 10 |                      | 26b | Additional consent provisions for collection and use of participant data and biological specimens in ancillary  | ___ 10 ___  |
| 11 |                      |     | studies, if applicable                                                                                          |             |
| 12 |                      |     |                                                                                                                 |             |
| 13 | Confidentiality      | 27  | How personal information about potential and enrolled participants will be collected, shared, and maintained    | _____       |
| 14 |                      |     | in order to protect confidentiality before, during, and after the trial                                         |             |
| 15 |                      |     |                                                                                                                 |             |
| 16 | Declaration of       | 28  | Financial and other competing interests for principal investigators for the overall trial and each study site   | ___ 17 ___  |
| 17 | interests            |     |                                                                                                                 |             |
| 18 |                      |     |                                                                                                                 |             |
| 19 | Access to data       | 29  | Statement of who will have access to the final trial dataset, and disclosure of contractual agreements that     | _____       |
| 20 |                      |     | limit such access for investigators                                                                             |             |
| 21 |                      |     |                                                                                                                 |             |
| 22 | Ancillary and post-  | 30  | Provisions, if any, for ancillary and post-trial care, and for compensation to those who suffer harm from trial | ___ n/a ___ |
| 23 | trial care           |     | participation                                                                                                   |             |
| 24 |                      |     |                                                                                                                 |             |
| 25 | Dissemination policy | 31a | Plans for investigators and sponsor to communicate trial results to participants, healthcare professionals,     | ___ 16 ___  |
| 26 |                      |     | the public, and other relevant groups (eg, via publication, reporting in results databases, or other data       |             |
| 27 |                      |     | sharing arrangements), including any publication restrictions                                                   |             |
| 28 |                      |     |                                                                                                                 |             |
| 29 |                      | 31b | Authorship eligibility guidelines and any intended use of professional writers                                  | ___ 17 ___  |
| 30 |                      |     |                                                                                                                 |             |
| 31 |                      | 31c | Plans, if any, for granting public access to the full protocol, participant-level dataset, and statistical code | _____       |
| 32 |                      |     |                                                                                                                 |             |
| 33 |                      |     |                                                                                                                 |             |
| 34 | <b>Appendices</b>    |     |                                                                                                                 |             |
| 35 |                      |     |                                                                                                                 |             |
| 36 | Informed consent     | 32  | Model consent form and other related documentation given to participants and authorised surrogates              | ___ n/a ___ |
| 37 | materials            |     |                                                                                                                 |             |
| 38 |                      |     |                                                                                                                 |             |
| 39 | Biological           | 33  | Plans for collection, laboratory evaluation, and storage of biological specimens for genetic or molecular       | ___ n/a ___ |
| 40 | specimens            |     | analysis in the current trial and for future use in ancillary studies, if applicable                            |             |
| 41 |                      |     |                                                                                                                 |             |

1  
2  
3  
4  
5  
6  
7  
8  
9  
10  
11  
12  
13  
14  
15  
16  
17  
18  
19  
20  
21  
22  
23  
24  
25  
26  
27  
28  
29  
30  
31  
32  
33  
34  
35  
36  
37  
38  
39  
40  
41  
42  
43  
44  
45  
46  
47

\*It is strongly recommended that this checklist be read in conjunction with the SPIRIT 2013 Explanation & Elaboration for important clarification on the items. Amendments to the protocol should be tracked and dated. The SPIRIT checklist is copyrighted by the SPIRIT Group under the Creative Commons "[Attribution-NonCommercial-NoDerivs 3.0 Unported](#)" license.

For peer review only

# BMJ Open

**Standard wound management versus negative pressure wound therapy in the treatment of adult patients having surgical incisions for major trauma to the lower limb, a two arm parallel group superiority randomised controlled trial: protocol for Wound Healing in Surgery for Trauma (WHIST)**

|                                 |                                                                                                                                                                                                                                                                                                                                                                                                                                                                                                                                                                                                                                                                                                            |
|---------------------------------|------------------------------------------------------------------------------------------------------------------------------------------------------------------------------------------------------------------------------------------------------------------------------------------------------------------------------------------------------------------------------------------------------------------------------------------------------------------------------------------------------------------------------------------------------------------------------------------------------------------------------------------------------------------------------------------------------------|
| Journal:                        | <i>BMJ Open</i>                                                                                                                                                                                                                                                                                                                                                                                                                                                                                                                                                                                                                                                                                            |
| Manuscript ID                   | bmjopen-2018-022115.R1                                                                                                                                                                                                                                                                                                                                                                                                                                                                                                                                                                                                                                                                                     |
| Article Type:                   | Protocol                                                                                                                                                                                                                                                                                                                                                                                                                                                                                                                                                                                                                                                                                                   |
| Date Submitted by the Author:   | 12-Apr-2018                                                                                                                                                                                                                                                                                                                                                                                                                                                                                                                                                                                                                                                                                                |
| Complete List of Authors:       | Achten, Juul; University of Oxford, NDORMS<br>Vadher, Karan; University of Oxford, Center for Statistics in Medicine<br>Bruce, Julie; University of Warwick, Warwick Clinical Trials Unit<br>Nanchahal, Jagdeep; The University of Oxford, Kennedy Institute<br>Spoors, Louise; University of Oxford, Oxford Trauma, NDORMS<br>Masters, James; University of Oxford Nuffield Department of Orthopaedics<br>Rheumatology and Musculoskeletal Sciences, Oxford Trauma<br>Dutton, Susan; University of Oxford, CSM<br>Madan, Jason; University of Warwick, Warwick Medical School<br>Costa, Matthew; University of Oxford, Nuffield Department of<br>Orthopaedics, Rheumatology, and Musculoskeletal Sciences |
| <b>Primary Subject Heading</b>: | Surgery                                                                                                                                                                                                                                                                                                                                                                                                                                                                                                                                                                                                                                                                                                    |
| Secondary Subject Heading:      | Emergency medicine                                                                                                                                                                                                                                                                                                                                                                                                                                                                                                                                                                                                                                                                                         |
| Keywords:                       | ACCIDENT & EMERGENCY MEDICINE, WOUND MANAGEMENT, SURGERY, Orthopaedic & trauma surgery < SURGERY                                                                                                                                                                                                                                                                                                                                                                                                                                                                                                                                                                                                           |
|                                 |                                                                                                                                                                                                                                                                                                                                                                                                                                                                                                                                                                                                                                                                                                            |

SCHOLARONE™  
Manuscripts

1  
2  
3  
4 Standard wound management versus negative pressure wound therapy in the treatment of adult  
5 patients having surgical incisions for major trauma to the lower limb, a two arm parallel group  
6 superiority randomised controlled trial: protocol for Wound Healing in Surgery for Trauma (WHIST)  
7  
8  
9

10  
11 Corresponding author

12 Professor Matthew Costa

13 Oxford Trauma, NDORMS

14 University of Oxford

15 Oxford, OX3 9DU

16 Matthew.costa@ndorms.ox.ac.uk

17 01865 223114  
18  
19  
20  
21  
22  
23

24 Juul Achten<sup>1</sup>, Karan Vadher <sup>2</sup>, Julie Bruce <sup>3</sup>, Jagdeep Nanchahal<sup>4</sup>, Louise Spoons<sup>1</sup>, James Masters<sup>1</sup>,  
25 Susan Dutton<sup>2</sup>, Jason Madan<sup>3</sup> and Matthew Costa<sup>1</sup>  
26  
27  
28

29 <sup>1</sup> Oxford Trauma, Nuffield Department of Orthopaedics, Rheumatology & Musculoskeletal Sciences,  
30 University of Oxford, Oxford, UK  
31

32 <sup>2</sup> Oxford Clinical Trials Research Unit, Centre for Statistics in Medicine, Nuffield Department of  
33 Orthopaedics, Rheumatology & Musculoskeletal Sciences, University of Oxford, Oxford, UK  
34

35 <sup>3</sup> Warwick Clinical Trials Unit, Warwick Medical School, The University of Warwick, Coventry, UK  
36

37 <sup>4</sup> Kennedy Institute of Rheumatology, Nuffield Department of Orthopaedics, Rheumatology &  
38 Musculoskeletal Sciences, University of Oxford, Oxford, UK  
39  
40  
41  
42

43 Word count:  
44  
45  
46  
47  
48  
49  
50  
51  
52  
53  
54  
55  
56  
57  
58  
59  
60

## Abstract

### *Introduction*

Patients with closed high-energy injuries associated with major trauma, have surprisingly high rates of surgical site infection in incisions created during fracture fixation. One factor which may reduce the risk of surgical site infection is the type of dressing applied over the closed surgical incision. In this multi-centre randomised clinical trial, negative-pressure wound therapy will be compared with standard dressings with outcomes of deep infection, quality of life, pain and disability.

### *Methods and analysis*

Adult patients presenting to hospital within 72 hours of sustaining major trauma, requiring a surgical incision to treat a fractured lower limb are eligible for inclusion. Randomisation, stratified by trial centre, open/closed fracture at presentation, and Injury Severity Score  $\leq 15$  vs ISS  $\geq 16$  will be administered via a secure web-based service using minimisation. The random allocation will be to either standard wound management or negative pressure wound therapy.

Trial participants will usually have clinical follow-up at the local fracture clinic for a minimum of 6 months, as per standard NHS practice. Diagnosis of deep infection will be recorded at 30 days. Functional, pain and quality of life outcome data will be collected using the Disability Rating Index, Douleur Neuropathique Questionnaire and EQ-5D-5L questionnaires at 3 months and 6 months post-injury. Further data will be captured on resource use and any late post-operative complications. Longer term outcomes will be assessed annually for five years and reported separately.

### *Ethics and Dissemination*

National Research Ethic Committee approved this study on 16/02/2016 16/WM/0006

The NIHR Health Technology Assessment monograph and a manuscript to a peer-reviewed journal will be submitted upon completion of this trial. The results of this trial will inform clinical practice on the clinical and cost effectiveness of the treatment of this injury.

This study has been registered on the ISRCTN registry with reference number ISRCTN12702354

*Abstract word count: 299*

**Strength and limitations of this study**

- Broad eligibility criteria to ensure generalisability.
- Deep infection data will be supplemented with patient-reported outcomes.
- Assessment of outcomes at multiple time points will allow for information on recovery profile.
- In addition to a comparison of clinical outcomes, a full cost-effectiveness evaluation will be performed.
- It will not be possible to blind patients to their allocated treatment, as the type of wound dressing will be clearly visible.

## Background

Major trauma is the leading cause of death in people aged under 45 years and a significant cause of short- and long-term morbidity. The National Audit Office (NAO) estimates that there are at least 20,000 cases of Major Trauma each year in England, resulting in 5,400 deaths and many survivors suffer permanent disabilities requiring long-term care. The NAO estimate that trauma costs the NHS between £0.3 and £0.4 billion a year for immediate treatment. This does not include the cost of subsequent hospital treatments, rehabilitation, home care support, or informal carers. The NAO estimate that the annual lost economic output from traumatic injury is between £3.3 billion and £3.7 billion.

Fractures of the limbs are extremely common injuries, with 85% of major trauma patients sustaining serious limb injuries.<sup>1</sup> In open fractures of the lower limb, where the broken bone is exposed to the environment by a breach in the skin, the risk of infection is particularly high.<sup>1</sup> However, even in closed high-energy injuries associated with major trauma, the rate of infection remains high. For example, tibial plateau fractures are associated with average infection rates of up to 27%,<sup>2-6</sup> while pilon fractures have an incidence of deep infections ranging from 5% to 40%<sup>7-10</sup>. If surgical site infection does occur, treatment frequently continues for years after the initial injury. This often involves prolonged courses of antibiotics, with attendant risk of antibiotic resistance in chronic wounds, and a huge health care cost associated with such injuries. A US study found that the average cost associated with infection was \$163,000 if the limb could be salvaged and \$500,000+ where amputation was necessary, and these only represent a fraction of the subsequent personal and societal costs<sup>11</sup>.

Major trauma patients are at greater risk of infection due to several factors, including the presence of antibiotic resistant organisms in the ITU and high-dependency environment. Furthermore, the presence of a wound haematoma or postoperative wound leak oozing may predispose to infection in wounds created by surgical incisions. One of the factors which may reduce the risk of surgical site infection is the type of dressing applied over the closed incision at completion of the operative procedure. Dressings may reduce bacterial ingress into the wound. The published literature suggests that the type of dressing applied to the wound influences the healing process itself<sup>12</sup>. This trial concerns the type of dressing that is applied to the closed surgical incision at the end of the operation.

Traditionally, the surgical incision is covered with an adhesive dressing or gauze maintained in place with a bandage to protect the wound from contamination from the outside environment. These 'standard dressings' have been used throughout the NHS and in military practice for many years. Negative-pressure wound therapy (NPWT) or topical negative pressure is an alternative form of



1  
2  
3 dressing which may be applied to closed surgical incisions. In this treatment, an 'open-cell', solid  
4 foam overlies the incision and is covered with a semipermeable membrane which is only permeable  
5 to gas. A sealed tube is used to connect the foam to a pump, which creates a partial vacuum over the  
6 wound. This negative-pressure therapy provides a sealed environment, preventing bacterial ingress  
7 and removes blood and serous fluid exuding from the wound. The application of negative pressure  
8 to the foam leads to the application of positive pressure to the wound bed and has been shown to  
9 reduce the incidence of wound haematoma<sup>13</sup>. Recent laboratory studies suggest that NPWT shifts  
10 the cytokine profile to being less inflammatory, potentially promoting the production of pro-  
11 angiogenic growth factors and enzymes responsible for matrix remodelling, leading to improved  
12 wound healing.<sup>12</sup> However, NPWT for closed wounds is considerably more expensive than traditional  
13 wound dressings. There has been only one randomised trial comparing standard wound dressing  
14 with NPWT for patients with closed surgical wounds following major trauma to the lower limb.<sup>13</sup> This  
15 trial demonstrated a reduction in the rate of late/deep wound infection in the group of patients  
16 treated with NPWT (9%) versus the standard dressing group (15%). However, the reduction was of  
17 borderline statistical significance ( $p=0.049$ ) and the study has been criticised in the subsequent  
18 Cochrane review for methodological flaws.<sup>14</sup>

19  
20 The recent Cochrane review for surgical wounds concluded that *"it is still not clear whether NPWT*  
21 *promotes faster healing and reduces complications associated with clean surgery"*. *"Given the cost*  
22 *and widespread use of NPWT, there is an urgent need for suitably powered, high-quality trials to*  
23 *evaluate the effects of the newer NPWT products that are designed for use on clean, closed surgical*  
24 *incisions. Such trials should focus initially on wounds that may be difficult to heal"*.<sup>14</sup> The WHIST Trial  
25 aims to address this evidence gap.  
26  
27

### 28 **Good Clinical Practice**

29  
30 The trial will be carried out in accordance with Medical Research council (MRC) Good Clinical  
31 Practice and applicable UK legislation using the following protocol.  
32  
33

### 34 **CONSORT**

35  
36 The trial will be reported in line with the CONSORT statement using the non-pharmacological  
37 treatment interventions extension.  
38  
39  
40  
41  
42  
43  
44  
45  
46  
47  
48  
49  
50  
51  
52  
53  
54  
55  
56  
57  
58  
59  
60

## Trial design

### Aim

The aim of this pragmatic randomised controlled trial is to compare negative-pressure wound therapy with standard wound dressings for the treatment of surgical incisions associated with major trauma to the lower limb on outcomes of deep infection, quality of life, pain and disability.

The primary objective for the RCT is:

To quantify and draw inferences on differences in the rate of 'deep surgical site infection (SSI)' of the lower limb in the 30 days after randomisation between treatment arms of standard wound dressing versus NPWT. Any wound infection that requires continuing medical intervention or has already led to amputation at the 30-day review will be considered a 'deep' infection.

The secondary objectives are:

- i) To quantify and draw inferences on observed differences in the disability rating index (DRI) in the 6 months after the major trauma.
- ii) To quantify and draw inferences on observed differences in general health-related quality of life in the 6 months after the major trauma.
- iii) To quantify and draw inferences on the quality of wound healing, using a validated, patient-reported assessment of the scar. The patient-reported assessment will be supplemented with photographs taken at 6 weeks to objectively assess wound healing and apparent signs of infection.
- iv) To determine the number and nature of complications in the first 6 months after the major trauma: including chronic pain, deep SSI at 90 days and further surgical interventions related to the injury.
- v) To investigate the cost effectiveness, of negative pressure wound therapy versus standard dressing for wounds associated with major trauma to the lower limbs.

### Outcome measures

The primary outcome measure for this study is **Deep Surgical Site Infection**; We will use the Centers for Disease Control and Prevention (CDC) definition of a "deep surgical site infection", that is a wound infection involving the tissues deep to the skin that occurs within 30 days of injury.<sup>15</sup>

The treating clinical team will make the diagnosis of 'infection', as per routine clinical practice. The treating clinicians will not be part of the research team. As the prompt diagnosis and treatment of

1  
2 infection is fundamental to the patient's routine clinical care, the treating surgeon/clinician will  
3  
4 always document such a change in management in the patient's medical record. The medical records  
5  
6 will be reviewed by an independent research associate who will complete the Clinical Reporting  
7  
8 Forms, which will include the specific criteria used by the CDC to define a "deep surgical site  
9  
10 infection". Any infection that requires continuing medical intervention or has already led to  
11  
12 amputation at or after the 30-day review will be considered a deep infection.

13 The secondary outcome measures in this trial are:

14  
15 **Disability Rating Index** measured using a self-administered, 12-item Visual Analogue Scale  
16  
17 questionnaire assessing the patients' own rating of their disability.<sup>16</sup> This measure was chosen as it  
18  
19 addresses gross body movements rather than specific joints or body segments. Therefore, it will  
20  
21 capture function and disability associated with different fractures and injuries of the lower limbs.

22  
23 **EuroQol EQ-5D-5L:** The EuroQol EQ-5D is a validated measure of health-related quality of life,  
24  
25 consisting of a five dimension health status classification system and a separate visual analogue  
26  
27 scale.<sup>17</sup> An updated version of the EQ-5D with 5 response levels, the EQ-5D-5L, has recently been  
28  
29 developed to enhance the responsiveness of the instrument to changes in patient health.<sup>18</sup>  
30  
31 Responses to the health status classification system will be converted into multi-attribute utility  
32  
33 (MAU) scores using tariffs currently under development for England.<sup>19</sup> These MAU scores will be  
34  
35 combined with survival data to generate QALY profiles for the purposes of the economic evaluation.  
36  
37 The EQ-5D has been validated to be completed by a patient's proxy in case of continued impaired  
38  
39 capacity.

40  
41 **Wound Healing:** A patient-reported scar assessment will be collected using the patient scale from  
42  
43 the Patient and Observer Scar Assessment Scale<sup>20</sup> consisting of six questions regarding different  
44  
45 aspects of the scar, as well as an overall assessment of the scar. This will be used to provide a  
46  
47 subjective patient-assessment of wound healing. An objective assessment of wound healing using a  
48  
49 standardised photograph of the wound from the 30-day review will be evaluated by two  
50  
51 independent experienced assessors who are blind to the treatment allocation. Patients will also be  
52  
53 asked to self-report any treatment for infection will be cross-referenced with the participant's  
54  
55 medical record. This will allow us to report deep infection at later time-points, for example at 90  
56  
57 days.

58  
59 **Complications:** Chronic pain: The proportion of patients reporting chronic pain post-injury with  
60  
neuropathic characteristics will be measured using the Douleur Neuropathique Questionnaire

(DN4<sup>21</sup>). Chronic pain after surgery and trauma is common and disabling but no previous studies have assessed the prevalence of persistent painful neuropathic characteristics after lower limb fracture. The interview versions of the DN4 is a short validated neuropathic pain screening tool comprising seven questions. This screening tool is recommended for use by the International Association for the Study of Pain (IASP<sup>22</sup>). Scores of 3 or greater are likely to be indicative of neuropathic pain. Patients will also be asked to self-report (or a consultee on their behalf, in case of continued impaired capacity) at each of the follow-up points on wound healing complications, any treatment for infection and any medical/surgical intervention related to infection associated with their surgical wound. Any self-report of treatment for infection will be cross-referenced with the participant's medical record. This will allow us to report deep infection at later time-points, for example at 90 days. All other post-operative complications and surgical interventions related to the index wound will be recorded.

**Resource use** will be monitored for the economic analysis. Unit cost data will be obtained from national databases such as the BNF and PSSRU Costs of Health and Social Care.<sup>23</sup> Where these are not available the unit cost will be estimated in consultation with the hospital finance department. The cost consequences following discharge, including NHS costs and patients' out-of-pocket expenses will be recorded via a short questionnaire which will be administered at three and six months post major trauma. Patient self-reported (or consultee reported) information on service use has been shown to be accurate in terms of the intensity of use of different services.<sup>24</sup>

#### *Data collection*

Table 1 displays the time points when outcome measures are being collected.

| <b>TIME POINT</b> | <b>DATA COLLECTION</b>                                                                                                      |
|-------------------|-----------------------------------------------------------------------------------------------------------------------------|
| Baseline          | DRI and EQ-5D <i>pre-injury and contemporary</i> ,                                                                          |
| 30 days           | Deep infection, complication records, scar assessment, operative record, photograph of limb wound                           |
| 3 months          | DRI, EQ-5D, DN4, scar assessment, record of complications/rehabilitation or other interventions and economics questionnaire |
| 6 months          | DRI, EQ-5D, DN4, scar assessment, record of complications/rehabilitation or other interventions and economics questionnaire |
| 12 months         | DRI, EQ-5D, DN4, record of complications/ further interventions                                                             |
| 2,3,4,5 years     | DRI, EQ-5D, DN4, record of complications/ further interventions                                                             |

**Table 1: outcome collection**

1  
2 For the purposes of long-term follow-up, patients will subsequently be contacted on an annual basis  
3  
4 for 5 years to complete the EQ-5D-5L, DRI and DN4 questionnaires. Longer-term follow-up will be  
5  
6 reported separately.  
7

## 8 9 **Sample size**

10 There has only been one previous randomised trial to compare negative pressure wound therapy to  
11 standard dressings for surgical incisions associated with major trauma to the lower limb. This trial  
12 indicated that the rate of 'late' (deep) infection was 15% in the standard dressing group versus 9% in  
13 the NPWT group.<sup>13</sup>

14 In the absence of a 'Minimum Clinically Important Difference' for deep wound infection, we surveyed  
15 surgeons in the UK Orthopaedic Trauma Society who perform surgery for major trauma to the limbs  
16 (unpublished data 2015). The survey showed that those who responded to the survey considered  
17 that a 6% reduction in the rate of 'deep infection' would, universally, be sufficient to change clinical  
18 practice with regard to the choice of wound dressing.  
19

20 Therefore, assuming a reduction in the proportion of patients having a deep infection from 15% to  
21 9%, 615 patients would be required in each group to provide 90% power at the 5% level. Our  
22 previous experience in clinical trials of lower limb fracture surgery for major trauma indicates that up  
23 to 20% of primary outcome data may be lost during the follow-up period; due to death and loss to  
24 follow-up. Therefore, we aim to recruit **1540 patients** in total for this trial.  
25  
26  
27  
28  
29  
30  
31  
32

## 33 **Methodology**

### 34 *Screening*

35  
36 Patients will be screened from the Emergency Department or Trauma Unit from participating trial  
37 centres. Throughout the study, screening logs will be kept at each site to determine the number of  
38 patients assessed for eligibility and any reasons for any exclusion. Patients who decline to participate  
39 or withdraw from the study will be given the opportunity to discuss/inform the research team of  
40 their reasoning behind their decision not to take part.  
41  
42

43 The patient's routine imaging on admission will be used, including any 'Major Trauma CT scan', and  
44 associated 'secondary survey' to identify the patient's injuries and calculate the Injury Severity Score  
45 (15 or less vs 16 or more) before randomisation. All major trauma patients in England are  
46 automatically considered for entry onto the national Trauma Audit and Research Network database,  
47 which requires the calculation of the Injury Severity Score. Therefore, all centres are familiar with the  
48 use of this major trauma scoring system.  
49  
50  
51  
52  
53  
54  
55  
56  
57  
58  
59  
60

### *Eligibility*

Patients will be eligible for WHIST if:

They are aged 16 years or older

Present to hospital within 72 hours of injury

They have a major trauma injury and/or TARN eligible injury as defined by eligibility for the UK Trauma Audit Research Network (TARN) database

They have a lower limb fracture requiring a surgical incision.

Some patients have major trauma affecting just one limb, for example heel, pilon and tibial plateau fractures. Since the wounds associated with these injuries are always at risk, we will include these injuries even if the patient is subsequently not included in TARN.

Patients will be excluded from participation in WHIST if:

They have an open fracture of the lower limb which cannot be closed primarily.

There is evidence that the patient would be unable to adhere to trial procedures or complete questionnaires. It is expected that for a small proportion of patients, for example those with head injury, this exclusion criterion will only be determined after randomisation. These patients will then be excluded from the study.

Patients who sustain injuries to areas of the body other than the lower limbs, which may affect the primary outcome measure, will have their other injuries documented but will still be included in the analysis. For patients with more than one lower limb injury, only the most severe wound will be included as the 'WHIST' wound in the trial. It will be up to the surgeon's discretion to decide which injury is the most severe.

### *Consent to participating*

Many patients with major trauma will be operated on immediately or on the next available trauma operating list. Some patients may be unconscious, all will be distracted by their injury and its subsequent treatment and all will have had large doses of opiates for pain relief, potentially affecting their ability to process study-related information. Similarly, patients' next of kin, carers and friends are often anxious at this time and may have difficulty in considering the large amounts of information that they are given about the injury and plan for treatment. In this emergency situation, the focus is on obtaining consent for surgery (where possible) and informing the patient and any next of kin about immediate clinical care. The consent procedure for this trial will reflect that of the surgery, with the attending clinician assessing capacity before taking consent for the surgical

1  
2 procedure and this capacity assessment then being used to decide on the proper approach to  
3  
4 consenting to the WHIST study. An appropriate method, in line with the mental capacity act and as  
5  
6 approved by the National Research Ethics Service, will then be used to gain either prospective or  
7  
8 retrospective consent from the patient or appropriate consultee, by an appropriately delegated  
9  
10 member of the research team.

### 11 *Randomisation*

12  
13 The treating surgeon will confirm participant eligibility at the end of the operative procedure but  
14  
15 before the wound dressing is applied. Randomisation will be on a 1:1 basis, using a validated  
16  
17 computer randomisation program managed centrally by the Oxford Clinical Trials Research Unit  
18  
19 (OCTRU). A minimisation algorithm, will be used to ensure balanced allocation of patients across the  
20  
21 two treatment groups, stratified by trial centre, open or closed fracture at presentation and Injury  
22  
23 Severity Score (ISS)  $\leq 15$  vs  $\geq 16$ . The first 30 participants will be randomised using simple  
24  
25 randomisation to seed the minimisation algorithm (generated by the trial statistician), and the  
26  
27 minimisation algorithm will have probabilistic element of 0.8 introduced to ensure unpredictability of  
28  
29 the treatment assignment. After the randomisation is received electronically by the surgical team,  
30  
31 the allocated treatment can be administered immediately.

### 32 *Post randomisation withdrawals/exclusions*

33  
34 Participants will be excluded in the post-randomisation phase if it is later established that they are  
35  
36 unable to adhere to trial procedures or complete questionnaires.

37  
38 Participants may decline to continue to take part in the trial at any time without prejudice. A decision  
39  
40 to decline consent or withdraw will not affect the standard of care the patient receives.

### 41 *Blinding*

42  
43 As the wound dressings and topical devices are clearly visible, the treating surgeon and trial  
44  
45 participants cannot be blinded to treatment allocation. However, the treating surgeons will not be  
46  
47 involved in study follow-up assessments or data collection for the trial. Data from Clinical Reporting  
48  
49 forms will be entered onto a central database administered by a data clerk independent of the  
50  
51 clinical team in the trial central office. Wound photographs taken at outpatient clinic at  
52  
53 approximately 30 days post-surgery will be reviewed independently by two experienced assessors  
54  
55 blinded to the treatment allocation.  
56  
57  
58  
59  
60

## **Trial treatments**

Patients with a fracture of the lower limb associated with major trauma usually have surgery on the next available trauma operating list. Some patients may be transferred to a Major Trauma Centre for definitive care – within the first 48 hours of injury – but will still have their initial surgery as soon as possible. All patients will receive general or regional anaesthesia. At the end of the initial operation, a dressing is applied to the surgical wound. WHIST will compare two types of wound dressing; standard dressing versus negative pressure wound therapy.

*Standard dressing.* The standard dressing for a surgical wound comprises a non-adhesive layer applied directly to the wound which is then covered by a sealed dressing or bandage. The standard dressing does not use ‘negative pressure’. The exact details of the materials used will be left to the discretion of the treating surgeon as per their routine practice but the details of each dressing applied will be recorded.

*Negative-pressure wound therapy.* The NPWT dressing uses an ‘open-cell’, solid foam which is laid onto the wound as an intrinsic part of a sealed dressing. A sealed tube connects the dressing to a built in mini-pump which creates a partial vacuum over the wound.

The NPWT dressing will be applied to the wound at the end of the operation according to the treating surgeon’s normal practice and the dressing manufacturer’s instructions. The wound may be re-dressed again on the ward; any further wound dressing will be recorded and will follow the allocated treatment unless otherwise clinically indicated.

### *Post-operative Rehabilitation*

Patients will usually be reviewed at 3 and 6 months, as per routine practice after this type of injury. Details about rehabilitation and additional follow-up appointments will be recorded but left entirely to the discretion of the treating clinicians, as the type of injury will vary between patients.

## **Adverse event management**

Serious adverse events (SAE) will be entered onto the Serious Adverse Event reporting form and reported to the central study team. However, some adverse events are foreseeable as part of the proposed treatment, and will not be reported on an SAE reporting form, but recorded on a complications form. These events include: any complications of anaesthesia or surgery (wound infection, bleeding or damage to adjacent structures such as nerves, tendons and blood vessels, delayed unions/non-unions, delayed wound healing, further surgery to remove/replace metalwork and thromboembolic events). All participants experiencing SAEs will be followed-up as per protocol until the end of the trial.



## End of trial

The end of the main phase of the trial will be defined as the collection of final six month outcome data from the last participant. Longer-term follow-up will be reported separately.

## Analysis

### *Statistical analysis*

Baseline characteristics and outcome measures will be reported overall and separately for the two treatment arms using standard statistical summaries (e.g. medians and ranges or means and variances, or proportions and percentages, dependent on the distribution of the outcomes) including graphical presentation where appropriate.

The primary analysis will investigate differences in the primary outcome measure, the proportion of patients with deep SSI, at 30 days post operation. Although we have no reason to expect that clustering effects will be important for this study, in reality the data will be hierarchical in nature, with patients naturally clustered into groups by recruiting centre. Therefore, we will account for this by generalizing the conventional logistic (fixed-effects) regression approach to a mixed-effects logistic regression analysis. This model will be used to assess differences in the rate of deep SSI between the study intervention groups, with results presented as odds ratios with associated 95% confidence intervals. The mixed-effects model will include a random effect to account for any heterogeneity in response due to the recruitment centre and fixed effects to adjust for open versus closed fractures and the ISS, participant age and gender.

An identically structured and formulated mixed-effects linear or logistic regression model (as appropriate) will be used to assess the effects of the interventions on secondary outcomes DRI and EQ-5D-5L (at both 3 and 6 months, and for the long-term follow-up). Supplementary analyses for these outcomes will include using area under the curve summary statistics calculated from the mixed model parameter estimates to provide an overall estimate of recovery over time.<sup>25</sup> Other dichotomous outcome variables, such as complications related to the trial interventions will be analysed in the same manner as the primary outcome. Temporal patterns of any complications will be presented graphically and if appropriate a time-to-event analysis (Kaplan-Meier survival analysis) will be used to assess the overall risk and risk within individual classes of complications.

It seems likely that some data may not be available due to voluntary withdrawal of patients, lack of completion of individual data items or general loss to follow-up. Missing data will be minimised and the reasons for missing data will be ascertained and reported separately by treatment group. The

1  
2 amount, nature and pattern of missing data will be carefully considered and missing data will be  
3 imputed, using multiple imputation if appropriate.

4  
5 The primary population for analysis will be on an intention-to-treat (ITT) basis, i.e. analysed as they  
6 were randomised. In addition to the ITT analyses, sensitivity analyses including on the per-protocol  
7 population and to assess the missing data assumption if missing data imputation is used, will also be  
8 undertaken and reported in parallel to, but subsidiary to, the main analyses.

9  
10 About 1-2% of patients are expected to die during follow-up, so this is unlikely to be a serious cause  
11 of bias. If appropriate, we will conduct a supplementary analysis taking account of the competing  
12 risk of death, using methods described by Varadhan et al.<sup>26</sup>

13  
14 All reported tests will be two-sided and considered to provide evidence for a significant difference if  
15 p-values are less than 0.05 (5% significance level).

16  
17 A detailed statistical analysis plan (SAP) will be agreed with the Data Safety and Monitoring  
18 Committee (DSMC) at the commencement of or early in the study. This will be updated prior to the  
19 final data-lock following a blinded analysis of the data. Any subsequent changes to the analysis  
20 outlined in the SAP will be clearly stated and justified in the final report. Interim analyses of efficacy  
21 outcomes are not planned and will be performed only where requested by the independent DSMC.

22  
23 Analyses will be undertaken using validated statistical software such as Stata (Stata Corp LP -  
24 <http://www.stata.com>) or the software package R (<http://www.r-project.org/>).

### 25 26 27 **Economic evaluation**

28  
29 An economic evaluation will be integrated into the trial design. The economic evaluation will be  
30 conducted from the recommended NHS and personal social services (PSS) perspective<sup>23</sup>. Data  
31 will be collected on the health and social service resources used in the treatment of each trial  
32 participant during the period between randomisation and 6 months post-randomisation. Trial  
33 data collection forms will record the duration of each form of hospital care, surgical procedures,  
34 adjunctive interventions, medication profiles, tests and procedures. If required, information on  
35 additional staff and material inputs associated with clinical complications will be obtained  
36 directly from patient and clinical records. At 3 and 6 months post-randomisation, trial  
37 participants will be asked to complete postal questionnaires profiling hospital (inpatient and  
38 outpatient) and community health and social care resource use and, for the purposes of  
39 sensitivity analysis, out-of-pocket expenditures and costs associated with lost productivity.  
40 Current UK unit costs will be applied to each resource item to value total resource use in each  
41 arm of the trial. *Per diem* costs for hospital care, delineated by level or intensity of care, will be  
42 calculated by the health economics researcher using data from detailed questionnaires  
43 completed by the local finance departments, giving cost data and apportioning these to different  
44  
45  
46  
47  
48  
49  
50  
51  
52  
53  
54  
55  
56  
57  
58  
59  
60

1  
2 categories of patient using a 'top-down' methodology. The unit costs of clinical events that are  
3 unique to this trial will be derived from the hospital accounts of the trial participating centres,  
4 although primary research that uses established accounting methods may also be required. The  
5 unit costs of community health and social services will largely be derived from national sources,  
6 although some calculations from first principles using established accounting methods may also  
7 be required.<sup>27</sup> Responses to the EQ-5D-5L will be converted into multi-attribute utility scores  
8 using the algorithm currently under development to reflect societal preferences in England.<sup>19 28</sup>

9  
10  
11  
12  
13  
14  
15  
16  
17  
18  
19  
20  
21  
22  
23  
24  
25  
26  
27  
28  
29  
30  
31  
32  
33  
34  
35  
36  
37  
38  
39  
40  
41  
42  
43  
44  
45  
46  
47  
48  
49  
50  
51  
52  
53  
54  
55  
56  
57  
58  
59  
60

<sup>29</sup> Crosswalking algorithms will be employed to generate supplementary utility values comparable with those derived from the EQ-5D-3L instrument.<sup>18</sup>

An incremental cost-effectiveness analysis, expressed in terms of incremental cost per quality-adjusted life year (QALY) gained, will be performed. Results will be presented using incremental cost-effectiveness ratios (ICERs) and cost-effectiveness acceptability curves (CEACs) generated via non-parametric bootstrapping. This accommodates sampling (or stochastic) uncertainty and varying levels of willingness to pay for an additional QALY. Issues with missing values, if they arise, will be accommodated using multiple imputation methods in line with the approach used in the clinical component of the trial.

### **Trial Oversight**

The day-to-day management of the trial will be the responsibility of the Clinical Trial Manager, based at Nuffield Department of Orthopaedics, Rheumatology and Musculoskeletal Sciences and supported by the OCTRU staff. This will be overseen by the Trial Management Group, who will meet monthly to assess progress. It will also be the responsibility of the Clinical Trial Manager to undertake training of the research associates at each of the trial centres. The Trial Statistician and Health Economist will be closely involved in setting up data capture systems, design of databases and clinical reporting forms.

A Trial Steering Committee (TSC) and a Data & Safety Monitoring Committee (DSMC) will be set up. The study DSMC will adopt a DAMOCLES charter which defines its terms of reference and operation in relation to oversight of the trial. They will not be asked to review any formal interim comparative analyses of effectiveness. They will, however, see copies of data accrued to date, or summaries of that data by treatment group and they will assess the screening algorithm against the eligibility criteria. They will also consider emerging evidence from other related trials or research and review related SAEs that have been reported. They may advise the chair of the Trial Steering Committee at any time if, in their view, the trial should be stopped for ethical reasons, including concerns about participant safety. DSMC meetings will be held at least annually during the recruitment phase of the study.

### Quality control

The study may be monitored, or audited in accordance with the current approved protocol, relevant regulations and standard operating procedures by the Host organization, Sponsor or appropriate Regulatory Authorities. A Monitoring Plan will be developed according to OCTRU standard operating procedures which involves a risk assessment. The monitoring activities are based on the outcome of the risk assessment and may involve central monitoring and site monitoring.

### Ethics and Dissemination

National Research Ethic Committee approved this study on the 16<sup>th</sup> of February 2016 (16/WM/0006). The study monograph for the National Institute for Health Research Health Technology Assessment will be prepared by the trial management team within three months of completion of the trial. A manuscript for a high impact peer-reviewed journal will be prepared simultaneously, which will allow for the results to be disseminated across the orthopaedic and rehabilitation communities, the wider medical community, NICE and policy makers. Authorship will be determined in accordance with the ICMJE guidelines and other contributors will be acknowledged. The results of this trial will substantially inform clinical practice on the clinical and cost effectiveness of the treatment of this injury. The results of this project will be disseminated to patients via patient-specific newsletters and through local mechanisms at all participating centres and a lay summary of the results will be available on the study website.

### Patient and Public Involvement

A series of formal qualitative interviews with patients and clinicians were performed in the development of this trial. The views of patients were used to inform and refine the trial interventions and processes. Two of the patients who contributed during the development work, have agreed to act as lay representatives on the Trial Management Team.

Towards the end of the trial, the lay representatives will lead the dissemination of the findings of this study through the wider audience. They will lead in the development of any material, including leaflets and website information used for this purpose.

**Author contributions**

MC/JB/JPM/JN wrote the background section and developed the research question. MC/JA/LS were responsible for the research methodology and management sections of the protocol. KV/SD wrote the sample size and statistical analysis sections of the protocol. JM wrote the health economic evaluation section of the protocol.

All authors reviewed and agreed the final manuscript.

**Competing interest**

MC is a member of the UK NIHR HTA General Board.

**Funding**

This project was funded by the UK National Institute for Health Research Health Technology Assessment (HTA) Programme (project number 14/199/14) and was supported by the National Institute for Health Research (NIHR) Oxford Biomedical Research Centre. The funder has not been involved in the design of the study. The views expressed are those of the authors and not necessarily those of the NHS, the NIHR or the Department of Health.

## 8. References

1. TARN. [www.tarn.co.uk](http://www.tarn.co.uk) 2015
2. Young MJ, Barrack RL. Complications of internal fixation of tibial plateau fractures. *Orthop Rev* 1994;23(2):149-54.
3. Stokel EA, Sadasivan KK. Tibial plateau fractures: standardized evaluation of operative results. *Orthopedics* 1991;14(3):263-70.
4. Stannard JP, martin SL. Tibial plateau fractures. In: Stannard JP S, AH KP, eds. *Surgical Treatment of Orthopaedic Trauma*. New York: Thieme 2007:715–41.
5. Mallik AR, Covall DJ, Whitelaw GP. Internal versus external fixation of bicondylar tibial plateau fractures. *Orthop Rev* 1992;21(12):1433-6.
6. Koval KJ, Helfet DL. Tibial Plateau Fractures: Evaluation and Treatment. *J Am Acad Orthop Surg* 1995;3(2):86-94.
7. Wyrsh B, McFerran MA, McAndrew M, et al. Operative treatment of fractures of the tibial plafond. A randomized, prospective study. *The Journal of bone and joint surgery American volume* 1996;78(11):1646-57.
8. Teeny SM, Wiss DA. Open reduction and internal fixation of tibial plafond fractures. Variables contributing to poor results and complications. *Clinical orthopaedics and related research* 1993(292):108-17.
9. McFerran MA, Smith SW, Boulas HJ, et al. Complications encountered in the treatment of pilon fractures. *J Orthop Trauma* 1992;6(2):195-200.
10. Blauth M, Bastian L, Krettek C, et al. Surgical options for the treatment of severe tibial pilon fractures: a study of three techniques. *J Orthop Trauma* 2001;15(3):153-60.
11. MacKenzie EJ, Jones AS, Bosse MJ, et al. Health-care costs associated with amputation or reconstruction of a limb-threatening injury. *The Journal of bone and joint surgery American volume* 2007;89(8):1685-92.
12. Glass GE, Murphy GF, Esmaeili A, et al. Systematic review of molecular mechanisms of action of negative-pressure wound therapy. *Br J Surg*. 2014; 101 (13): 1627-36
13. Stannard JP, Volgas DA, McGwin G, 3rd, et al. Incisional negative pressure wound therapy after high-risk lower extremity fractures. *J Orthop Trauma* 2012;26(1):37-42.
14. Webster J, Scuffham P, Stankiewicz M, et al. Negative pressure wound therapy for skin grafts and surgical wounds healing by primary intention. *The Cochrane database of systematic reviews* 2014;10:CD009261.
15. Horan TC, Andrus M, Dudeck MA. CDC/NHSN surveillance definition of health care-associated infection and criteria for specific types of infections in the acute care setting. *Am J Infect Control* 2008;36(5):309-32.

- 10.1016/j.ajic.2008.03.002 [published Online First: 2008/06/10]
16. Salen BA, Spangfort EV, Nygren AL, et al. The Disability Rating Index: an instrument for the assessment of disability in clinical settings. *J Clin Epidemiol* 1994;47(12):1423-35.
17. Brooks R. EuroQol: the current state of play. *Health Policy* 1996;37(1):53-72.
18. Herdman M, Gudex C, Lloyd A, et al. Development and preliminary testing of the new five-level version of EQ-5D (EQ-5D-5L). *Quality of life research : an international journal of quality of life aspects of treatment, care and rehabilitation* 2011;20(10):1727-36.
19. Oppe M, Devlin NJ, van Hout B, et al. A program of methodological research to arrive at the new international EQ-5D-5L valuation protocol. *Value in health : the journal of the International Society for Pharmacoeconomics and Outcomes Research* 2014;17(4):445-53.
20. Draaijers, L.J., et al., *The patient and observer scar assessment scale: a reliable and feasible tool for scar evaluation*. *Plastic and reconstructive Surgery*, 2004. 113(7): p. 1960-1965.
21. Bouhassira D, Lanteri-Minet M, Attal N, et al. Prevalence of chronic pain with neuropathic characteristics in the general population. *Pain* 2008;136(3):380-7.
22. Haanpaa M, Attal N, Backonja M, et al. NeuPSIG guidelines on neuropathic pain assessment. *Pain* 2011;152(1):14-27.
23. From: CLA. Unit Costs of Health and Social Care 2014. 2014 [
24. Self-reports of health care utilisation: can a questionnaire replace a diary? 16th Annual meeting of the international society for health technology assessment in health care; 2000; The Hague, The Netherlands.
25. Bell M.L., King, M. T., & Fairclough, D. L. (2014). Bias in area under the curve for longitudinal clinical trials with missing patient reported outcome data: summary measures versus summary statistics. *SAGE Open*, 4(2), 2158244014534858
26. Varadhan R, Weiss CO, Segal JB, et al. Evaluating health outcomes in the presence of competing risks: a review of statistical methods and clinical applications. *Medical care* 2010;48(6 Suppl):S96-105.
27. Allen C, Beecham J. Costing services: ideals & reality. In: Beecham ANaJ, ed. *Costing Community Care: Theory & Practice* Ashgate Publishing Ltd 1993:25-42.
28. Brazier J, Roberts J, Deverill M. The estimation of a preference-based measure of health from the SF-36. *J Health Econ* 2002;21(2):271-92.
29. Dolan P. Modeling valuations for EuroQol health states. *Med Care* 1997;35(11):1095-108.

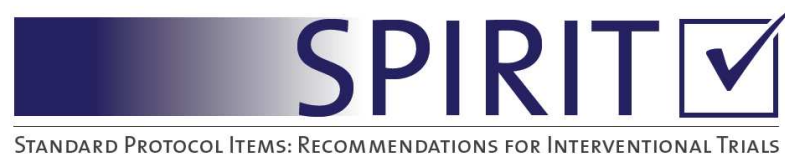

SPIRIT 2013 Checklist: Recommended items to address in a clinical trial protocol and related documents\*

| Section/item                      | Item No | Description                                                                                                                                                                                                                                                                              | Addressed on page number |
|-----------------------------------|---------|------------------------------------------------------------------------------------------------------------------------------------------------------------------------------------------------------------------------------------------------------------------------------------------|--------------------------|
| <b>Administrative information</b> |         |                                                                                                                                                                                                                                                                                          |                          |
| Title                             | 1       | Descriptive title identifying the study design, population, interventions, and, if applicable, trial acronym                                                                                                                                                                             | ___1___                  |
| Trial registration                | 2a      | Trial identifier and registry name. If not yet registered, name of intended registry                                                                                                                                                                                                     | ___2___                  |
|                                   | 2b      | All items from the World Health Organization Trial Registration Data Set                                                                                                                                                                                                                 | ___n/a___                |
| Protocol version                  | 3       | Date and version identifier                                                                                                                                                                                                                                                              | ___n/a___                |
| Funding                           | 4       | Sources and types of financial, material, and other support                                                                                                                                                                                                                              | ___2+17___               |
| Roles and responsibilities        | 5a      | Names, affiliations, and roles of protocol contributors                                                                                                                                                                                                                                  | ___1+17___               |
|                                   | 5b      | Name and contact information for the trial sponsor                                                                                                                                                                                                                                       | ___n/a___                |
|                                   | 5c      | Role of study sponsor and funders, if any, in study design; collection, management, analysis, and interpretation of data; writing of the report; and the decision to submit the report for publication, including whether they will have ultimate authority over any of these activities | ___17___                 |
|                                   | 5d      | Composition, roles, and responsibilities of the coordinating centre, steering committee, endpoint adjudication committee, data management team, and other individuals or groups overseeing the trial, if applicable (see Item 21a for data monitoring committee)                         | ___n/a___                |



1  
2  
3  
4  
5  
6  
7  
8  
9  
10  
11  
12  
13  
14  
15  
16  
17  
18  
19  
20  
21  
22  
23  
24  
25  
26  
27  
28  
29  
30  
31  
32  
33  
34  
35  
36  
37  
38  
39  
40  
41  
42  
43  
44  
45  
46  
47**Introduction**

|                          |    |                                                                                                                                                                                                           |             |
|--------------------------|----|-----------------------------------------------------------------------------------------------------------------------------------------------------------------------------------------------------------|-------------|
| Background and rationale | 6a | Description of research question and justification for undertaking the trial, including summary of relevant studies (published and unpublished) examining benefits and harms for each intervention        | ___ 4-5 ___ |
|                          | 6b | Explanation for choice of comparators                                                                                                                                                                     | ___ 4-5 ___ |
| Objectives               | 7  | Specific objectives or hypotheses                                                                                                                                                                         | ___ 6 ___   |
| Trial design             | 8  | Description of trial design including type of trial (eg, parallel group, crossover, factorial, single group), allocation ratio, and framework (eg, superiority, equivalence, noninferiority, exploratory) | ___ 1 ___   |

**Methods: Participants, interventions, and outcomes**

|                      |     |                                                                                                                                                                                                                                                                                                                                                                                |               |
|----------------------|-----|--------------------------------------------------------------------------------------------------------------------------------------------------------------------------------------------------------------------------------------------------------------------------------------------------------------------------------------------------------------------------------|---------------|
| Study setting        | 9   | Description of study settings (eg, community clinic, academic hospital) and list of countries where data will be collected. Reference to where list of study sites can be obtained                                                                                                                                                                                             | ___ 9 ___     |
| Eligibility criteria | 10  | Inclusion and exclusion criteria for participants. If applicable, eligibility criteria for study centres and individuals who will perform the interventions (eg, surgeons, psychotherapists)                                                                                                                                                                                   | ___ 9-10 ___  |
| Interventions        | 11a | Interventions for each group with sufficient detail to allow replication, including how and when they will be administered                                                                                                                                                                                                                                                     | ___ 11-12 ___ |
|                      | 11b | Criteria for discontinuing or modifying allocated interventions for a given trial participant (eg, drug dose change in response to harms, participant request, or improving/worsening disease)                                                                                                                                                                                 | ___ n/a ___   |
|                      | 11c | Strategies to improve adherence to intervention protocols, and any procedures for monitoring adherence (eg, drug tablet return, laboratory tests)                                                                                                                                                                                                                              | ___           |
|                      | 11d | Relevant concomitant care and interventions that are permitted or prohibited during the trial                                                                                                                                                                                                                                                                                  | ___           |
| Outcomes             | 12  | Primary, secondary, and other outcomes, including the specific measurement variable (eg, systolic blood pressure), analysis metric (eg, change from baseline, final value, time to event), method of aggregation (eg, median, proportion), and time point for each outcome. Explanation of the clinical relevance of chosen efficacy and harm outcomes is strongly recommended | ___ 6-8 ___   |

|    |                      |    |                                                                                                                                                                                       |           |
|----|----------------------|----|---------------------------------------------------------------------------------------------------------------------------------------------------------------------------------------|-----------|
| 1  |                      |    |                                                                                                                                                                                       |           |
| 2  |                      |    |                                                                                                                                                                                       |           |
| 3  | Participant timeline | 13 | Time schedule of enrolment, interventions (including any run-ins and washouts), assessments, and visits for participants. A schematic diagram is highly recommended (see Figure)      | ___ 8 ___ |
| 4  |                      |    |                                                                                                                                                                                       |           |
| 5  | Sample size          | 14 | Estimated number of participants needed to achieve study objectives and how it was determined, including clinical and statistical assumptions supporting any sample size calculations | ___ 9 ___ |
| 6  |                      |    |                                                                                                                                                                                       |           |
| 7  |                      |    |                                                                                                                                                                                       |           |
| 8  | Recruitment          | 15 | Strategies for achieving adequate participant enrolment to reach target sample size                                                                                                   | _____     |
| 9  |                      |    |                                                                                                                                                                                       |           |
| 10 |                      |    |                                                                                                                                                                                       |           |

### 11 **Methods: Assignment of interventions (for controlled trials)**

#### 12 Allocation:

|    |                                  |     |                                                                                                                                                                                                                                                                                                                                                          |             |
|----|----------------------------------|-----|----------------------------------------------------------------------------------------------------------------------------------------------------------------------------------------------------------------------------------------------------------------------------------------------------------------------------------------------------------|-------------|
| 13 |                                  |     |                                                                                                                                                                                                                                                                                                                                                          |             |
| 14 |                                  |     |                                                                                                                                                                                                                                                                                                                                                          |             |
| 15 | Sequence generation              | 16a | Method of generating the allocation sequence (eg, computer-generated random numbers), and list of any factors for stratification. To reduce predictability of a random sequence, details of any planned restriction (eg, blocking) should be provided in a separate document that is unavailable to those who enrol participants or assign interventions | ___ 11 ___  |
| 16 |                                  |     |                                                                                                                                                                                                                                                                                                                                                          |             |
| 17 |                                  |     |                                                                                                                                                                                                                                                                                                                                                          |             |
| 18 |                                  |     |                                                                                                                                                                                                                                                                                                                                                          |             |
| 19 |                                  |     |                                                                                                                                                                                                                                                                                                                                                          |             |
| 20 | Allocation concealment mechanism | 16b | Mechanism of implementing the allocation sequence (eg, central telephone; sequentially numbered, opaque, sealed envelopes), describing any steps to conceal the sequence until interventions are assigned                                                                                                                                                | ___ 11 ___  |
| 21 |                                  |     |                                                                                                                                                                                                                                                                                                                                                          |             |
| 22 |                                  |     |                                                                                                                                                                                                                                                                                                                                                          |             |
| 23 |                                  |     |                                                                                                                                                                                                                                                                                                                                                          |             |
| 24 | Implementation                   | 16c | Who will generate the allocation sequence, who will enrol participants, and who will assign participants to interventions                                                                                                                                                                                                                                | ___ 11 ___  |
| 25 |                                  |     |                                                                                                                                                                                                                                                                                                                                                          |             |
| 26 |                                  |     |                                                                                                                                                                                                                                                                                                                                                          |             |
| 27 | Blinding (masking)               | 17a | Who will be blinded after assignment to interventions (eg, trial participants, care providers, outcome assessors, data analysts), and how                                                                                                                                                                                                                | ___ 11 ___  |
| 28 |                                  |     |                                                                                                                                                                                                                                                                                                                                                          |             |
| 29 |                                  |     |                                                                                                                                                                                                                                                                                                                                                          |             |
| 30 |                                  | 17b | If blinded, circumstances under which unblinding is permissible, and procedure for revealing a participant's allocated intervention during the trial                                                                                                                                                                                                     | ___ n/a ___ |
| 31 |                                  |     |                                                                                                                                                                                                                                                                                                                                                          |             |
| 32 |                                  |     |                                                                                                                                                                                                                                                                                                                                                          |             |
| 33 |                                  |     |                                                                                                                                                                                                                                                                                                                                                          |             |

### 34 **Methods: Data collection, management, and analysis**

|    |                         |     |                                                                                                                                                                                                                                                                                                                                                                                                              |             |
|----|-------------------------|-----|--------------------------------------------------------------------------------------------------------------------------------------------------------------------------------------------------------------------------------------------------------------------------------------------------------------------------------------------------------------------------------------------------------------|-------------|
| 35 |                         |     |                                                                                                                                                                                                                                                                                                                                                                                                              |             |
| 36 | Data collection methods | 18a | Plans for assessment and collection of outcome, baseline, and other trial data, including any related processes to promote data quality (eg, duplicate measurements, training of assessors) and a description of study instruments (eg, questionnaires, laboratory tests) along with their reliability and validity, if known. Reference to where data collection forms can be found, if not in the protocol | ___ 6-8 ___ |
| 37 |                         |     |                                                                                                                                                                                                                                                                                                                                                                                                              |             |
| 38 |                         |     |                                                                                                                                                                                                                                                                                                                                                                                                              |             |
| 39 |                         |     |                                                                                                                                                                                                                                                                                                                                                                                                              |             |
| 40 |                         |     |                                                                                                                                                                                                                                                                                                                                                                                                              |             |
| 41 |                         |     |                                                                                                                                                                                                                                                                                                                                                                                                              |             |
| 42 |                         |     |                                                                                                                                                                                                                                                                                                                                                                                                              |             |
| 43 |                         |     |                                                                                                                                                                                                                                                                                                                                                                                                              |             |
| 44 |                         |     |                                                                                                                                                                                                                                                                                                                                                                                                              |             |
| 45 |                         |     |                                                                                                                                                                                                                                                                                                                                                                                                              |             |
| 46 |                         |     |                                                                                                                                                                                                                                                                                                                                                                                                              |             |
| 47 |                         |     |                                                                                                                                                                                                                                                                                                                                                                                                              |             |

1  
2  
3  
4  
5  
6  
7  
8  
9  
10  
11  
12  
13  
14  
15  
16  
17

|                     |     |                                                                                                                                                                                                                                                                   |               |
|---------------------|-----|-------------------------------------------------------------------------------------------------------------------------------------------------------------------------------------------------------------------------------------------------------------------|---------------|
|                     | 18b | Plans to promote participant retention and complete follow-up, including list of any outcome data to be collected for participants who discontinue or deviate from intervention protocols                                                                         | ___ n/a ___   |
| Data management     | 19  | Plans for data entry, coding, security, and storage, including any related processes to promote data quality (eg, double data entry; range checks for data values). Reference to where details of data management procedures can be found, if not in the protocol | _____         |
| Statistical methods | 20a | Statistical methods for analysing primary and secondary outcomes. Reference to where other details of the statistical analysis plan can be found, if not in the protocol                                                                                          | ___ 13-15 ___ |
|                     | 20b | Methods for any additional analyses (eg, subgroup and adjusted analyses)                                                                                                                                                                                          | ___ 13-15 ___ |
|                     | 20c | Definition of analysis population relating to protocol non-adherence (eg, as randomised analysis), and any statistical methods to handle missing data (eg, multiple imputation)                                                                                   | ___ 13-15 ___ |

**Methods: Monitoring**

18  
19  
20  
21  
22  
23  
24  
25  
26  
27  
28  
29  
30  
31  
32  
33  
34

|                 |     |                                                                                                                                                                                                                                                                                                                                       |             |
|-----------------|-----|---------------------------------------------------------------------------------------------------------------------------------------------------------------------------------------------------------------------------------------------------------------------------------------------------------------------------------------|-------------|
| Data monitoring | 21a | Composition of data monitoring committee (DMC); summary of its role and reporting structure; statement of whether it is independent from the sponsor and competing interests; and reference to where further details about its charter can be found, if not in the protocol. Alternatively, an explanation of why a DMC is not needed | ___ 15 ___  |
|                 | 21b | Description of any interim analyses and stopping guidelines, including who will have access to these interim results and make the final decision to terminate the trial                                                                                                                                                               | ___ n/a ___ |
| Harms           | 22  | Plans for collecting, assessing, reporting, and managing solicited and spontaneously reported adverse events and other unintended effects of trial interventions or trial conduct                                                                                                                                                     | ___ 12 ___  |
| Auditing        | 23  | Frequency and procedures for auditing trial conduct, if any, and whether the process will be independent from investigators and the sponsor                                                                                                                                                                                           | ___ 15 ___  |

**Ethics and dissemination**

35  
36  
37  
38  
39  
40  
41  
42  
43  
44  
45  
46  
47

|                          |    |                                                                                           |            |
|--------------------------|----|-------------------------------------------------------------------------------------------|------------|
| Research ethics approval | 24 | Plans for seeking research ethics committee/institutional review board (REC/IRB) approval | ___ 16 ___ |
|--------------------------|----|-------------------------------------------------------------------------------------------|------------|

|    |                      |     |                                                                                                                 |             |
|----|----------------------|-----|-----------------------------------------------------------------------------------------------------------------|-------------|
| 1  |                      |     |                                                                                                                 |             |
| 2  |                      |     |                                                                                                                 |             |
| 3  | Protocol             | 25  | Plans for communicating important protocol modifications (eg, changes to eligibility criteria, outcomes,        | _____       |
| 4  | amendments           |     | analyses) to relevant parties (eg, investigators, REC/IRBs, trial participants, trial registries, journals,     |             |
| 5  |                      |     | regulators)                                                                                                     |             |
| 6  |                      |     |                                                                                                                 |             |
| 7  | Consent or assent    | 26a | Who will obtain informed consent or assent from potential trial participants or authorised surrogates, and      | ___ 10 ___  |
| 8  |                      |     | how (see Item 32)                                                                                               |             |
| 9  |                      |     |                                                                                                                 |             |
| 10 |                      | 26b | Additional consent provisions for collection and use of participant data and biological specimens in ancillary  | ___ 10 ___  |
| 11 |                      |     | studies, if applicable                                                                                          |             |
| 12 |                      |     |                                                                                                                 |             |
| 13 | Confidentiality      | 27  | How personal information about potential and enrolled participants will be collected, shared, and maintained    | _____       |
| 14 |                      |     | in order to protect confidentiality before, during, and after the trial                                         |             |
| 15 |                      |     |                                                                                                                 |             |
| 16 | Declaration of       | 28  | Financial and other competing interests for principal investigators for the overall trial and each study site   | ___ 17 ___  |
| 17 | interests            |     |                                                                                                                 |             |
| 18 |                      |     |                                                                                                                 |             |
| 19 | Access to data       | 29  | Statement of who will have access to the final trial dataset, and disclosure of contractual agreements that     | _____       |
| 20 |                      |     | limit such access for investigators                                                                             |             |
| 21 |                      |     |                                                                                                                 |             |
| 22 | Ancillary and post-  | 30  | Provisions, if any, for ancillary and post-trial care, and for compensation to those who suffer harm from trial | ___ n/a ___ |
| 23 | trial care           |     | participation                                                                                                   |             |
| 24 |                      |     |                                                                                                                 |             |
| 25 | Dissemination policy | 31a | Plans for investigators and sponsor to communicate trial results to participants, healthcare professionals,     | ___ 16 ___  |
| 26 |                      |     | the public, and other relevant groups (eg, via publication, reporting in results databases, or other data       |             |
| 27 |                      |     | sharing arrangements), including any publication restrictions                                                   |             |
| 28 |                      |     |                                                                                                                 |             |
| 29 |                      | 31b | Authorship eligibility guidelines and any intended use of professional writers                                  | ___ 17 ___  |
| 30 |                      |     |                                                                                                                 |             |
| 31 |                      | 31c | Plans, if any, for granting public access to the full protocol, participant-level dataset, and statistical code | _____       |
| 32 |                      |     |                                                                                                                 |             |
| 33 |                      |     |                                                                                                                 |             |
| 34 | <b>Appendices</b>    |     |                                                                                                                 |             |
| 35 |                      |     |                                                                                                                 |             |
| 36 | Informed consent     | 32  | Model consent form and other related documentation given to participants and authorised surrogates              | ___ n/a ___ |
| 37 | materials            |     |                                                                                                                 |             |
| 38 |                      |     |                                                                                                                 |             |
| 39 | Biological           | 33  | Plans for collection, laboratory evaluation, and storage of biological specimens for genetic or molecular       | ___ n/a ___ |
| 40 | specimens            |     | analysis in the current trial and for future use in ancillary studies, if applicable                            |             |
| 41 |                      |     |                                                                                                                 |             |
| 42 |                      |     |                                                                                                                 |             |
| 43 |                      |     |                                                                                                                 |             |
| 44 |                      |     |                                                                                                                 |             |
| 45 |                      |     |                                                                                                                 |             |
| 46 |                      |     |                                                                                                                 |             |
| 47 |                      |     |                                                                                                                 |             |

1  
2  
3  
4  
5  
6  
7  
8  
9  
10  
11  
12  
13  
14  
15  
16  
17  
18  
19  
20  
21  
22  
23  
24  
25  
26  
27  
28  
29  
30  
31  
32  
33  
34  
35  
36  
37  
38  
39  
40  
41  
42  
43  
44  
45  
46  
47

\*It is strongly recommended that this checklist be read in conjunction with the SPIRIT 2013 Explanation & Elaboration for important clarification on the items. Amendments to the protocol should be tracked and dated. The SPIRIT checklist is copyrighted by the SPIRIT Group under the Creative Commons "[Attribution-NonCommercial-NoDerivs 3.0 Unported](#)" license.

For peer review only
