# Supplementary material for: Standard wound management versus negative-pressure wound therapy in the treatment of adult patients having surgical incisions for major trauma to the lower limb—a two-arm parallel group superiority randomised controlled trial: protocol for Wound Healing in Surgery for Trauma (WHIST)
Source: PubMed Central journal article supplement — BMJ Open. 2018 Jun 7;8(6):e022115. doi: 10.1136/bmjopen-2018-022115 (PMC6009622; doi:10.1136/bmjopen-2018-022115), 2018-06-07
Supplement: bmjopen-2018-022115.reviewer_comments.pdf [file bmjopen-2018-022115.reviewer_comments.pdf]

## PEER REVIEW HISTORY

BMJ Open publishes all reviews undertaken for accepted manuscripts. Reviewers are asked to complete a checklist review form (<http://bmjopen.bmj.com/site/about/resources/checklist.pdf>) and are provided with free text boxes to elaborate on their assessment. These free text comments are reproduced below.

## ARTICLE DETAILS

|                            |                                                                                                                                                                                                                                                                                              |
|----------------------------|----------------------------------------------------------------------------------------------------------------------------------------------------------------------------------------------------------------------------------------------------------------------------------------------|
| <b>TITLE (PROVISIONAL)</b> | Standard wound management versus negative pressure wound therapy in the treatment of adult patients having surgical incisions for major trauma to the lower limb, a two arm parallel group superiority randomised controlled trial: protocol for Wound Healing in Surgery for Trauma (WHIST) |
| <b>AUTHORS</b>             | Achten, Juul; Vadher, Karan; Bruce, Julie; Nanchahal, Jagdeep; Spoons, Louise; Masters, James; Dutton, Susan; Madan, Jason; Costa, Matthew                                                                                                                                                   |

This article was not externally reviewed at BMJ Open. Protocols that have been independently assessed prior to submission to BMJ Open are usually fast-tracked to publication on the grounds that further substantial changes will not be possible. This independent assessment will usually be external, independent review for both a substantial grant award from a non-commercial or government funder and ethics approval.
